1     **Regionalized tissue fluidization by an actomyosin cable is required for epithelial**  
2                     **gap closure during insect gastrulation**

3

4     Jain A.<sup>1,2</sup>, Ulman V.<sup>1,3</sup>, Mukherjee A.<sup>4</sup>, Prakash M.<sup>1,5</sup>, Pimpale L.<sup>1,6</sup>, Muenster S.<sup>1,4,5,6</sup>,  
5     Haase R.<sup>1,5</sup>, Panfilio K.A.<sup>7,8</sup>, Jug F.<sup>1,5</sup>, Grill S.W.<sup>1,5,6,9</sup>, Tomancak P.<sup>1,3</sup> and Pavlopoulos  
6     A.<sup>10,11</sup>

7

8     <sup>1</sup>Max-Planck-Institute of Molecular Cell Biology and Genetics, Dresden, Germany

9     <sup>2</sup>Technische Universität Dresden, Dresden, Germany

10    <sup>3</sup>IT4Innovations, Technical University of Ostrava, Czech Republic

11    <sup>4</sup>Max-Planck-Institute for the Physics of Complex Systems, Dresden, Germany

12    <sup>5</sup>Center for Systems Biology, Dresden, Germany

13    <sup>6</sup>Biotechnology Center, TU Dresden, Germany

14    <sup>7</sup>Institute for Zoology: Developmental Biology, University of Cologne, Cologne, Germany

15    <sup>8</sup>School of Life Sciences, University of Warwick, Coventry, UK

16    <sup>9</sup>Cluster of Excellence Physics of Life, TU Dresden, Germany

17    <sup>10</sup>Janelia Research Campus, Howard Hughes Medical Institute, Ashburn, United States

18    <sup>11</sup>Institute of Molecular Biology and Biotechnology, Foundation for Research and  
19    Technology-Hellas, Heraklion, Greece

20

21

22

23

24

25

26

27

28     To whom correspondence shall be addressed: [tomancak@mpi-cbg.de](mailto:tomancak@mpi-cbg.de),

29     [a.pavlopoulos@imbb.forth.gr](mailto:a.pavlopoulos@imbb.forth.gr)

30

31 **ABSTRACT**

32

33 **Many animal embryos pull and close an epithelial sheet around the spherical or ellipsoidal**  
34 **egg surface during a gastrulation process known as epiboly. The ovoidal geometry**  
35 **dictates that the epithelial sheet first expands and subsequently compacts. Moreover, the**  
36 **epithelial sheet spreading over the sphere is mechanically stressed and this stress needs**  
37 **to be released. Here we show that during extraembryonic tissue (serosa) epiboly in the red**  
38 **flour beetle *Tribolium castaneum*, the non-proliferative serosa becomes regionalized into**  
39 **two distinct territories: a dorsal region under higher tension away from the leading edge**  
40 **with larger non-rearranging cells, and a more fluid ventral region under lower tension**  
41 **surrounding the leading edge with smaller cells undergoing cell intercalation. Our results**  
42 **suggest that fluidization of the leading edge is caused by a heterogeneous actomyosin**  
43 **cable that drives sequential eviction and intercalation of individual cells away from the**  
44 **serosa margin. Since this developmental solution utilized during epiboly resembles the**  
45 **mechanism of wound healing in other systems, we propose actomyosin cable-driven local**  
46 **tissue fluidization as a conserved morphogenetic module for closure of epithelial gaps.**

47

48 Epiboly is one of the evolutionarily conserved morphogenetic movements during animal  
49 gastrulation<sup>1</sup>. It involves spreading of an epithelial sheet over the spherical or ellipsoidal egg. The  
50 sheet eventually forms a continuous layer that entirely surrounds the embryo and the yolk sac.  
51 During this morphogenetic event, fundamental geometrical and mechanical problems arise. First,  
52 in order to cover the entire egg, the epithelium has to expand in surface area. However, once the  
53 egg equator is reached, the expanding tissue must also undergo a regional compaction at its  
54 leading edge in order to seal seamlessly at the bottom of the sphere (**Fig 1A**). Studies in fish  
55 showed that the tissue spreading is mediated by changes in cell shape, cell number and cell  
56 arrangement coupled to constriction of an actomyosin ring in the yolk at the leading edge of the  
57 sheet<sup>2-5</sup>. However, it remains unclear whether pulling forces at the leading edge expand cells  
58 uniformly throughout the tissue and how cells behave at the leading edge that needs to compact.  
59 Second, spreading over a sphere induces mechanical stress in the tissue. In zebrafish,  
60 mechanical stress during epibolic expansion is released by oriented cell divisions in the tissue<sup>4</sup>.  
61 In other epiboly systems however, cell division does not occur, and thus other unknown  
62 mechanisms have to alleviate built-up stress.

63

64 For example, in many insect taxa, the developing embryo is completely surrounded by a  
65 protective epithelial cell layer of extraembryonic fate called the serosa<sup>6-10</sup>. In the red flour beetle,  
66 *Tribolium castaneum*, extraembryonic serosal cells are initially specified as an anterior cap of the  
67 cellular blastoderm, which subsequently spreads over the gastrulating embryonic part of the  
68 blastoderm<sup>11</sup>. This process resembles vertebrate epiboly but occurs in the complete absence of  
69 serosal cell division (**Fig 1B**). The spreading serosal tissue expands over the posterior pole and  
70 eventually closes ventrally over the contracting embryo in a process known as serosa window  
71 closure<sup>12-14</sup>. However, it is not understood how the leading serosal cells at the rim of the serosa  
72 window achieve final compaction. It is also unknown if and how mechanical tension arises and  
73 gets released in the serosal tissue during spreading.

74

75 To address these questions, we used the *Tribolium* serosal epiboly and closure as a model to  
76 understand how the mechanical properties of cells and physical forces are regionalized to wrap  
77 a non-dividing epithelial sheet around an ellipsoidal egg. We imaged the progression of serosa  
78 spreading with multi-view light sheet microscopy in embryos expressing a nuclei-marking eGFP  
79 (**Fig 1C, Supplementary movie 1**). Taking advantage of the serosa's topology as a superficial  
80 egg layer, we unwrapped the 3D data into 2D cartographic time-lapse projections and segmented  
81 the serosal part of the blastoderm tissue<sup>15</sup> (**Fig 1D, Supplementary Fig 1A-D, Supplementary**  
82 **movie 2 and 11**). The serosa covered initially about 35% of the egg surface and spread to cover  
83 100% of the surface (**Fig 1E**). In order to examine the expansion at the cellular level, we imaged  
84 embryos expressing LifeAct-eGFP that labels cortical F-actin<sup>13,16</sup> and segmented the apical  
85 surface of all serosal cells at 5 reference stages (**Fig 1B**) during serosal expansion (**Fig 1G**). The  
86 results showed that the ~3-fold expansion in serosal tissue surface area was mirrored by a ~3-  
87 fold expansion of the apical area of serosal cells from stage 1 to stage 4 (**Fig 1F**). Strikingly,  
88 serosal cells did not expand uniformly: at stage 3, the apical area of ventral cells in the vicinity of  
89 the serosa window were on average 29% smaller compared to dorsal cells (**Fig 1F-G**). We  
90 conclude that serosal epiboly exhibits inhomogeneous apical cell area expansion in order to  
91 accommodate the ventral area compaction required by the elliptical geometry of the egg.

92  
93 An alternative but not mutually exclusive mechanism to achieve ventral area compaction is by  
94 reducing the number of marginal cells at the serosa window (**Fig 2A**)<sup>12</sup>. While it is in principle  
95 possible that leading cells are not excluded and converge to a multicellular rosette, such a rosette  
96 has not been observed during *Tribolium* serosa window closure<sup>12,13,17</sup>. Our cell tracking  
97 experiments showed that the initial number of approximately 75 leading cells progressively  
98 decreased to only 5-6 cells during final serosal closure (**Fig 2B,C**) and that these cells originated  
99 from all around the periphery of the window (**Fig 2D, Supplementary movie 3**). Careful  
100 examination of individual cells at the leading edge in time-lapse recordings of embryos of the  
101 LifeAct-eGFP transgenic line revealed frequent rearrangement of cells resulting in cells leaving  
102 the serosa edge (**Fig 2E,F, Supplementary movie 4**). The leaving cells shrunk their leading edge  
103 facing the serosa window and elongated radially in the direction approximately orthogonal to the  
104 window (**Supplementary Figure 2A-C**). Upon leaving the edge, the cells gradually relaxed to a  
105 hexagonal shape as they reintegrated into the bulk of the tissue (**Supplementary Fig 2D**).  
106 Mapping of those behaviours onto the time-lapse cartographic projections revealed that the  
107 serosa was regionalized into two distinct territories. Dorsal cells, several cell diameters away from  
108 the edge, were hexagonally packed, isotropically stretched and showed no significant neighbor  
109 exchanges. By contrast, ventral cells surrounding the serosa window were irregularly packed,  
110 showed anisotropically stretched shapes (**Supplementary Fig 3A**) and frequently exchanged  
111 neighbors (**Fig 2H, Supplementary movie 5 and 11**).

112  
113 Movement of cells past each other during neighbor exchange has been linked to increased tissue  
114 fluidity<sup>18-21</sup>. A useful theoretical framework to assess the behavior of the serosal tissue is the  
115 shape index analysis that infers solid-like or fluid-like tissue states from cell shapes in epithelia<sup>22-</sup>  
116 <sup>24</sup>. The theory predicts a critical value of shape index  $p = 3.81$  marking the transition from a solid-  
117 like to a fluid-like behaviour (but see also<sup>25</sup> and below). Our results showed that at stage 3 ventral  
118 cells had on average a high shape index  $\bar{p}$  of 4.25 characteristic of fluid-like tissues, unlike dorsal

119 cells that had a significantly lower  $p$ -value of 3.93, which indicated that the ventral region is much  
120 more fluid-like compared to the dorsal region (**Fig 2G,I, Supplementary Movie 11**). These results  
121 raised the hypothesis that during serosal epiboly the tissue in the vicinity of the window undergoes  
122 a solid-to-fluid structural transition (fluidization) that unjams the tissue and enables seamless  
123 closure.

124  
125 We next asked what the mechanical function of the ventral serosa fluidization could be. If the  
126 dorsal serosa behaves as a solid-like material, we expect that while being pulled over the egg it  
127 would increasingly build up tension. This rising tension would make it increasingly more difficult  
128 to further close the serosa window. The function of the ventral cell rearrangement in the proximity  
129 of the serosa window could then be in releasing this tension to facilitate closure. Consequently,  
130 we would predict a difference in tissue tension between dorsal and ventral serosa. To test this,  
131 we performed laser ablations, inflicting large incisions across 3-4 cells at different reference  
132 stages and positions and compared the recoil velocities<sup>26</sup> (**Fig 3A,B**). These tissue cutting  
133 experiments showed that the tension in the dorsal side increased progressively as the serosa  
134 expanded posteriorly and ventrally around the posterior pole and plateaued after the serosa  
135 window formed (**Fig 3C**). The intact cells neighboring the ablation site responded to the release  
136 in tissue tension post-ablation by immediately decreasing their apical areas by 1/3<sup>rd</sup>  
137 (**Supplementary Fig 4**). These two results suggest that the dorsal tissue behaves as an elastic  
138 solid from a mechanical perspective. Importantly, for incisions that were inflicted at the ventral  
139 side of the serosa exhibiting cell rearrangements, the tension was lower compared to the dorsal  
140 side (**Fig 3D**). Thus, laser cutting experiments corroborate the regionalization of the serosa into  
141 a more solid dorsal region that stays under high tension and a more fluid ventral region that has  
142 relaxed its tension.

143  
144 While the tension profile supports the hypothesis of ventral tissue fluidization suggested by the  
145 shape index analysis, it had been recently shown that the relationship between shape index and  
146 tissue fluidity is non-linear when a tissue is under anisotropic tension<sup>25</sup>. Since we obtained  
147 evidence that the *Tribolium* serosa exhibits anisotropic tension, we applied this extended  
148 theoretical framework, and calculated a local cell alignment factor  $Q$  across the serosal tissue  
149 (see Methods)<sup>27</sup>. The theory predicts that for a given value of  $Q$  the shape index  $p$  needs to exceed  
150 an adjusted threshold value in order for the tissue to be fluid-like. For each local value of  $Q$  across  
151 the cartographic maps, we plotted the difference between the actual shape index value ( $p$ ) of the  
152 cell and the local threshold signifying solid-to-fluid transition (**Fig 3E,F, Supplementary Movie**  
153 **11**). This analysis revealed that also when taking tissue tension anisotropy into consideration, the  
154 ventral cells lining the rim of the serosa window exhibited a distinct fluid-like state during closure  
155 in stark contrast with the rest of the epithelium exhibiting a solid-like state. Therefore, both  
156 experimental and theoretical evidence support the local fluidization of the ventral-most serosal  
157 tissue.

158  
159 We next asked what induces the local tissue fluidization. Recent live imaging studies of *Tribolium*  
160 gastrulation suggested that an accumulation of actin, resembling a cable, emerges at the leading  
161 edge of the serosa<sup>13,28</sup>. To test whether this accumulation indeed represents a contractile  
162 actomyosin cable, we imaged the distribution of non-muscle myosin II (hereafter referred to as



163 myosin) in gastrulating embryos injected with the *Tribolium* myosin regulatory light chain mRNA  
164 fused to eGFP (Tc-sqh-eGFP). During epiboly, myosin accumulated at the boundary between the  
165 serosa and the embryonic primordium (**Fig 4A,B, Supplementary Fig 5A,C, Supplementary**  
166 **movie 6**). Actomyosin enrichment at the serosa-embryonic boundary initiated shortly after epiboly  
167 started, and became more pronounced as the boundary stretched around the posterior pole. It  
168 peaked during serosa window closure and at this stage appeared as a contiguous supra-cellular  
169 cable (**Fig 4B, Supplementary Fig 5A,C**). The actomyosin cable lined the rim of the serosa  
170 window and underwent shape transformations from triangular to spherical during closure (**Fig 4C,**  
171 **Supplementary Fig 5B**). By segmenting and measuring the length and intensity of LifeAct  
172 accumulation, we found that the cable first increased its length until the serosa-embryonic  
173 boundary reached the posterior pole and then decreased in length to zero during window closure  
174 (**Supplementary Fig 5D**). As the cable shrunk, the total myosin intensity normalized by cable  
175 length stayed the same or increased over time (**Supplementary Fig 5E**). Laser cutting  
176 experiments of individual cell edges contributing to the actomyosin cable revealed that the cable  
177 was under tension and that this tension increased over time (**Fig 4D,E,F, Supplementary movie**  
178 **7**). If the cable acted as a contiguous contractile ring, one would expect global loss of tension  
179 after a cut. Instead, when we inflicted successive laser cuts at different positions of the same  
180 cable, the recoil velocities were comparable (**Fig 4G**). This indicated that individual cells of the  
181 cable contract their myosin-loaded edges independently and implied that the serosa window edge  
182 acts as a chain of independently contractile units. Moreover, the myosin distribution around the  
183 cable circumference showed strong heterogeneity, with some cells exhibiting higher and other  
184 cells exhibiting lower myosin accumulation. Cells with more myosin contracted their cable-forming  
185 edges and were evicted from the leading edge of the serosa earlier than cells with lower levels of  
186 myosin (**Fig 4H,I, Supplementary movie 8**). Since the myosin intensity correlates with the cell  
187 leaving behavior, we conclude that differential line tension along the cable circumference drives  
188 the eviction of the cells from the cable and the resulting cell rearrangements lead to tissue  
189 fluidization and eventual closure of the epithelial gap (**Fig 4J**).

190  
191 Such a model predicts that in the absence of the actomyosin cable the serosa window would fail  
192 to close ventrally. Since the actomyosin cable forms at the extraembryonic-embryonic tissue  
193 boundary, we hypothesized that we could abolish the emergence of the cable by RNAi knockdown  
194 of the *Tribolium* transcription factor-encoding *zerknüllt-1* gene (*Tc-zen1*) that specifies  
195 extraembryonic (serosal) cell fate<sup>11</sup>. Live imaging of *Tc-zen1<sup>RNAi</sup>* embryos injected with LifeAct-  
196 eGFP revealed indeed the absence of the actomyosin cable (**Fig 5A,B, Supplementary movie**  
197 **9**). While such *Tc-zen1<sup>RNAi</sup>* embryos started the contraction and folding of the embryonic  
198 primordium as wildtype embryos, the epibolic movement halted and a ventral serosa window  
199 failed to form and close (**Fig 5A,B,E, Supplementary movie 10**). Compared to wildtype, the  
200 dorsal spreading cells in *Tc-zen1<sup>RNAi</sup>* embryos became larger, presumably due to their lower  
201 number (**Fig 5C**). The cells on the ventral leading edge, however, were much smaller (**Fig 5D,F**),  
202 did not elongate anisotropically (**Fig 5B, Supplementary Fig 3B**), did not exchange neighbors  
203 and were not evicted from the leading edge (**Fig 5E**). Finally, although the shape index of the  
204 dorsal cells in *Tc-zen1<sup>RNAi</sup>* embryos was comparable to wildtype (**Fig 5G,H**), the ventral region  
205 showed a significantly lower shape index (**Fig 5G,I**) with less pronounced regionalization around  
206 the serosal window (**Fig 5G,J**). We conclude that in the absence of the actomyosin cable, the

207 marginal cells fail to become evicted from the leading edge, tissue fluidization fails to occur and,  
208 consequently, the epithelial tissue fails to remodel and close its gap.

209 The epibolic expansion of the *Tribolium* serosa to envelop the entire egg surface is a dynamic  
210 morphogenetic process constrained by the ellipsoidal geometry of the egg and the mechanical  
211 properties of the tissue. Our data suggest that the regionalized tissue fluidization at its leading  
212 edge solves the geometrical and mechanical problems associated with serosal epiboly. First, it  
213 addresses the geometric constraints necessitating both the expansion and regional compaction  
214 of the tissue to close the gap. While the bulk of the tissue expands in a manner similar to an  
215 elastic solid material, the fluid-like ventral region remodels, halts the increase in cell area and  
216 therefore can remain compact. Second, in the absence of cell divisions, which have been  
217 implicated as a stress-release mechanism in fish<sup>4,29</sup>, local cell rearrangements induced by  
218 actomyosin contractility at the leading edge release the mechanical stress in the non-proliferative  
219 serosal sheet and maintain epithelial integrity during closure.

220  
221 Our results suggest that the contractile forces of the heterogeneous actomyosin network operate  
222 at the single-cell level to exclude marginal cells individually from the serosa window. The order in  
223 which cells are evicted is dictated by the local myosin accumulation at each cable-forming edge.  
224 This is consistent with previous findings that myosin intensity correlates with tension in wound  
225 healing cable<sup>30,31</sup>. Furthermore, it has been suggested that a non-uniform stepwise contractility of  
226 individual edges is necessary for efficient epithelial closure during wound healing in *Drosophila*  
227 embryos and neural tube closure in chordates<sup>32,33</sup>. This kind of sequential contraction is likely  
228 operating during window closure to dissipate serosa resistance. Last but not the least, a recent  
229 study proposed that tissue fluidization is required for seamless wound healing in damaged  
230 *Drosophila* imaginal discs<sup>18</sup>. Similar to the actomyosin cable of the *Tribolium* serosa window, the  
231 cable that assembles at the leading edge of the wound evicts cells from the wound periphery and  
232 promotes cell intercalation resulting in tissue fluidization and acceleration of epithelial gap closure.  
233 All these striking similarities point towards a conserved morphogenetic function of actomyosin  
234 cables in shaping and repairing epithelia by local tissue fluidization.

235

## 236 **Acknowledgements:**

237 We would like to thank Thorsten Horn for teaching us various *Tribolium* techniques, Matthew A.  
238 Benton for kindly providing the pCS2+LifeAct-eGFP plasmid and sharing embryonic injection  
239 protocol and discussions, Sebastian Streichan for optimising ImSANE for *Tribolium* SPIM data  
240 and critical discussions, Alexander Dibrov for helping with tissue cartography cell segmentations,  
241 Matthias Merkel for providing code for tissue shape analysis, Christopher Schmied for optimizing  
242 Snakemake SPIM data analysis pipeline for our datasets, Michaela Burkon for helping with  
243 *Tribolium* stock keeping and in doing parental RNAi experiments, MPI-CBG Light Microscopy  
244 Facility for help with imaging, Mette Handberg-Thorsager and Yu-Wen Hsieh for sharing plasmids  
245 and help with cloning, Ivana Viktorinova for schematic drawings, Anna Giles and Johannes  
246 Schinko (Averof lab), Peter Kitzmann (Bucher lab) and the van der Zee lab for sharing valuable  
247 transgenic lines and Siegfried Roth for critical discussions.

248

## 249 **Author Contributions**

250 A.J. designed the research, performed experiments, analyzed the data, and wrote the manuscript.  
251 V.U produced image analysis software and analyzed data. A.M contributed to data analysis, M.P  
252 helped in segmenting data, L.P helped in laser ablation experiments, S.M contributed reagents,  
253 data and was involved in discussions, R.H. produced image analysis software and contributed to  
254 analysis workflow design, K.A.P. conducted RNAi parameter validation experiments and was  
255 involved in discussions, F.J. contributed to data segmentation, S.W.G helped in interpreting laser  
256 ablation data and was involved in discussions, P.T. and A.P. conceived and oversaw the project,  
257 and wrote the manuscript.

258

## 259 **Methods**

### 260 ***Tribolium* rearing and stocks**

261 *Tribolium castaneum* stocks were kept at 32°C and 70% relative humidity on whole-grain or white  
262 flour supplemented with yeast powder according to standard procedures<sup>34</sup>. All mRNA injections  
263 were performed into embryos of the *vermillion*<sup>white</sup> strain. The following transgenic lines were used  
264 for live imaging: i) EFA-nGFP, ubiquitously expressing a nuclear-localized GFP reporter<sup>35</sup> (kindly  
265 provided by Michalis Averof's lab); ii)  $\alpha$ Tub-H2A-eGFP, ubiquitously expressing a nuclear eGFP  
266 reporter (kindly provided by Peter Kitzmann from Gregor Bucher's lab); EFA-Gap43-YFP,2A-  
267 Histone-RFP, ubiquitously expressing both a membrane YFP and a nuclear RFP reporter (kindly  
268 provided by Johannes Schinko and Anna Gilles from Michalis Averof's lab); iv)  $\alpha$ Tub-LifeAct-  
269 eGFP, ubiquitously labelling filamentous actin with eGFP<sup>16</sup> (kindly provided by the Van der Zee  
270 lab); v)  $\alpha$ Tub-Tc-sqh-eGFP, ubiquitously labelling the *Tribolium* non-muscle myosin II through its  
271 regulatory light chain (Tc-sqh). Details about the  $\alpha$ Tub-Tc-sqh-eGFP transgenesis construct are  
272 available upon request. Overview of genotypes and constructs used in the study is provided in

273 **Supplementary Methods Table 1.**

## 274 **RNA injections**

275 Actin and myosin dynamics were visualized in *vermillion*<sup>white</sup> embryos injected with *in vitro*  
276 transcribed capped mRNAs encoding LifeAct-eGFP or Tc-sqh-eGFP that were synthesized from  
277 linearized plasmid templates pT7-LifeAct-eGFP and pCS2+-Tc-sqh-eGFP, respectively<sup>13,28</sup>. For  
278 the RNAi knock-down experiments of *Tc-zen1*, the dsRNA against the *Tribolium zerknüllt-1* gene

279 (TC000921) was synthesized with primers optimized for gene specificity (a 203-bp amplicon  
280 outside of the conserved homeobox region)<sup>36</sup>. The mRNAs and the dsRNA were each injected  
281 at a final concentration of 1 mg/ml. Eggs from the *vermillion<sup>white</sup>* strain were collected for two hours  
282 at 30°C, aged for another hour at 30°C and dechorionated in 16% commercial Klorix bleach for 1  
283 to 2 minutes. Dechorionated pre-blastoderm embryos were mounted on a 1% agar bed and were  
284 microinjected in air through their anterior pole under a brightfield upright microscope as previously  
285 described<sup>13,34</sup> (**Supplementary Fig 1A**). Injected eggs were incubated in humid chambers at 30°C  
286 for ~2 hours and the most homogeneously labeled and bright embryos were selected for  
287 imaging. For parental knock-down of *Tc-zen1* by RNAi, dsRNA was injected into the abdomen of  
288 female pupae collected from the  $\alpha$ Tub-LifeAct-eGFP transgenic line. Injected adult females were  
289 crossed to males from the same line and their eggs were collected for imaging.

290

### 291 **Live imaging with confocal and light-sheet microscopy**

292 Confocal live imaging was carried out at 25°C or 30°C on an inverted Zeiss LSM 780 system  
293 equipped with a temperature-controlled incubator. Embryos were mounted in 1% agarose in glass  
294 bottom petri dishes and covered in water. Embryos were scanned with a Zeiss 25x/0.8 NA Plan-  
295 Aplanachromat multi-immersion objective or a Zeiss 40x/1.2 NA C-Aplanachromat water-dipping  
296 objective with pixel sizes ranging between 0.2  $\mu$ m and 0.55  $\mu$ m, a z-step of 2  $\mu$ m and a temporal  
297 resolution of 5 minutes. Multi-view light-sheet imaging (referred to as Selective Plane Illumination  
298 Microscopy (SPIM) or light sheet microscopy) was carried out on a Zeiss Lightsheet Z.1  
299 microscope equipped with a 20x/1.0 NA Plan Aplanachromat water-immersion detection objective  
300 and two 10x/0.2 NA dry illumination objectives. Embryos were embedded in glass capillaries in  
301 1% low melting agarose dissolved in 1xPBS together with fluorescent beads as previously  
302 describe<sup>37,38</sup>. For each embryo, z-stacks were acquired from 5 views every 72° with voxel size  
303 0.381  $\mu$ m x 0.381  $\mu$ m x 2.0  $\mu$ m. The starting point in the time-stamps used for all experiments was  
304 the last (12<sup>th</sup>) round of synchronous nuclear divisions which precedes the formation of the uniform  
305 blastoderm and all subsequent morphogenetic events<sup>12</sup>. Parameters for all live imaging  
306 experiments are summarized in the **Supplementary Methods Table 1**.

### 307 **Laser ablations**

308 Laser ablations were performed either on an inverted Zeiss LSM 780 NLO with a 40x/1.2 NA  
309 water-dipping objective using an 800nm pulsed infrared laser or on a customized spinning disc  
310 confocal unit with a 63x water-dipping objective using an ultraviolet laser microdissection  
311 apparatus similar to the one described in<sup>39</sup>. On the first system, three planes with 1-2 $\mu$ m z-spacing  
312 were imaged every 1.6 sec (Fig 4F), 2.5 sec (Fig 4G) 2.6 sec (Fig 3C) and the cut was performed  
313 in the middle plane, while on the latter system a single plane was recorded every 0.5 second (Fig  
314 3D). Tissue cuts were about 12  $\mu$ m long spanning 3 to 4 cell diameters, while ablations of single  
315 edges were about 5  $\mu$ m long. The recoil velocity of ablated edges was measured between 6 post-  
316 cut time frames using the manual tracking plugin in Fiji. For each cut, two to three independent  
317 tracks of the recoiling tissue edges were averaged. The initial recoil velocity was estimated using  
318 standard fitting procedures<sup>40</sup>.

319

320

321

## 322 **Image processing**

323 The multi-view light-sheet datasets were registered and fused using Fiji plugins as previously  
324 described<sup>41-43</sup>. The 4D (3D+time) fused datasets were converted into 3D (2D+time) time-lapse  
325 maps by making cylindrical projections using the ImSANE software<sup>15</sup>. Cells were segmented  
326 using a deep learning-based approach called StarDist which is capable of learning morphological  
327 priors<sup>44</sup>. Different neural networks were trained for different markers (membrane and actin labels).  
328 The training data were obtained by generating realistic looking synthetic microscopic images of  
329 *Tribolium* using Generative Adversarial Networks (GANs). The generated synthetic data were  
330 evaluated visually against the real microscopy data to ensure textural and morphological  
331 consistency between the two. After training StarDist networks on such synthetic data, they were  
332 applied to the real microscopy images and the predictions were manually curated in Labkit (Fiji  
333 plugin, <http://sites.imagej.net/Labkit/>) to fix any segmentation mistakes. After cartographic  
334 projections, some cells on the horizontal (top/bottom) edges of the maps were necessarily cut in  
335 order to unfurl the 3D embryo to 2D. Those incomplete cells were excluded from analysis.  
336 Distortions that are inherent to the mapping of curved surfaces onto a plane were corrected with  
337 custom Fiji plugins (available on the "Tomancak lab" Fiji Update site) thereby allowing the  
338 measurement of quantities like size, circularity, shape factor, density, velocity, and the local cell  
339 alignment (see below). Consequently, the scale bars in map projections are only approximate and  
340 reflect accurately the sizes only in the middle portions of the maps. Nuclei in the depth color-  
341 coded cartographic projections were tracked using MaMuT<sup>38</sup> and Mastodon (both available via  
342 Fiji Update sites).

343

## 344 **Shape index analysis**

345 Shape index was calculated for each segmented cell in the 2D cartographic projections as  $p =$   
346  $P/\sqrt{A}$  where  $P$  is the cell perimeter and  $A$  is the cross-sectional area<sup>22</sup>. The measurements  
347 were distortion-corrected using the above-mentioned Fiji plugins and plotted onto the segmented  
348 cartographic projection as a color map.

349 The local *cell shape alignment index*  $Q$  was calculated as in Wang et al., 2019<sup>25</sup>. Briefly, cells in  
350 the map projection were converted into a triangular mesh connecting the centers of all adjacent  
351 segmented cells. That is, where three (or more) cells touch, a triangle (or a triangle fan) with  
352 vertices coinciding with centers of adjacent cells was formed. For every triangle, a degree  $q$  of  
353 deviation from equilateral triangle was computed<sup>27</sup>. For every cell then, its shape alignment index  
354  $Q$  became a weighted average over  $q$  from all triangles whose vertex coincides with this cell's  
355 center. Using this  $Q$ , an adjusted shape index threshold was determined as  $p_{adj} = p_o + 4bQ^2$  for  
356  $p_o=3.94$  and  $b=0.43$ <sup>25</sup>. According to Wang et al. 2019 simulations this threshold marks solid-to-  
357 fluid transition for a given anisotropy in the tissue (i.e. for a given value of cell shape alignment  
358 index  $Q$ ). The tissue fluidity for a given cell was then calculated as a difference between its actual  
359 shape index  $p$  and the  $p_{adj}$  for a given local value of  $Q$ . This difference was converted into a color  
360 code and displayed on the cartographic projection. Green color signifies solid-like local tissue  
361 properties ( $p < p_{adj}$ ), brown color fluid-like local tissue properties ( $p > p_{adj}$ ) and black color marks  
362 the vicinity to the theoretically predicted solid-to-fluid transition ( $p = p_{adj}$ ).

363

364



365 **References**

366

- 367 1. Solnica-Krezel, L. Conserved patterns of cell movements during vertebrate gastrulation.  
368 *Curr. Biol.* **15**, R213-28 (2005).
- 369 2. Keller, R. E. & Trinkaus, J. P. Rearrangement of Enveloping Layer Cells Without  
370 Disruption of the Epithelial Permeability Barrier as a Factor in Fundulus Epiboly. *Dev. Biol.*  
371 **120**, 12–24 (1987).
- 372 3. Köppen, M. Coordinated cell-shape changes control epithelial movement in zebrafish and  
373 *Drosophila*. *Development* **133**, 2671–2681 (2006).
- 374 4. Campinho, P. *et al.* Tension-oriented cell divisions limit anisotropic tissue tension in  
375 epithelial spreading during zebrafish epiboly. *Nat. Cell Biol.* **15**, 1405–1414 (2013).
- 376 5. Behrndt, M. *et al.* Forces Driving Epithelial Spreading in Zebrafish Gastrulation. *Science*  
377 **338**, 257–260 (2012).
- 378 6. Panfilio, K. A. Extraembryonic development in insects and the acrobatics of blastokinesis.  
379 *Dev. Biol.* **313**, 471–491 (2008).
- 380 7. Schmidt-Ott, U. & Kwan, C. W. Morphogenetic functions of extraembryonic membranes in  
381 insects. *Curr. Opin. Insect Sci.* **13**, 86–92 (2016).
- 382 8. Jacobs, C. G. C. & van der Zee, M. Immune competence in insect eggs depends on the  
383 extraembryonic serosa. *Dev. Comp. Immunol.* **41**, 263–269 (2013).
- 384 9. Jacobs, C. G. C., Rezende, G. L., Lamers, G. E. M. & van der Zee, M. The extraembryonic  
385 serosa protects the insect egg against desiccation. *Proc. R. Soc. B Biol. Sci.* **280**,  
386 20131082–20131082 (2013).
- 387 10. Caroti, F. *et al.* Decoupling from yolk sac is required for extraembryonic tissue spreading  
388 in the scuttle fly *Megaselia abdita*. *eLife* **7**, e34616 (2018).
- 389 11. van der Zee, M., Berns, N. & Roth, S. Distinct Functions of the *Tribolium zerknu*’llt Genes  
390 in Serosa Specification and Dorsal Closure. *Curr. Biol.* **15**, 624–636 (2005).
- 391 12. Handel, K., Grünfelder, C. G., Roth, S. & Sander, K. *Tribolium* embryogenesis: a SEM  
392 study of cell shapes and movements from blastoderm to serosal closure. *Dev. Genes Evol.*  
393 **210**, 167–179 (2000).
- 394 13. Benton, M. A., Akam, M. & Pavlopoulos, A. Cell and tissue dynamics during *Tribolium*  
395 embryogenesis revealed by versatile fluorescence labeling approaches. *Development*  
396 **140**, 3210–3220 (2013).
- 397 14. Benton, M. A. & Pavlopoulos, A. *Tribolium* embryo morphogenesis: may the force be with  
398 you. *BioArchitecture* **4**, 16–21 (2014).
- 399 15. Heemskerk, I. & Streichan, S. J. Tissue cartography: compressing bio-image data by  
400 dimensional reduction. *Nat. Methods* **12**, 1139–1142 (2015).
- 401 16. van Drongelen, R., Vazquez-Faci, T., Huijben, T. A. P. M., van der Zee, M. & Idema, T.  
402 Mechanics of epithelial tissue formation. *J. Theor. Biol.* **454**, 182–189 (2018).
- 403 17. Benton, M. A. *et al.* Fog signaling has diverse roles in epithelial morphogenesis in insects.  
404 *eLife* **8**, (2019).
- 405 18. Tetley, R. J. *et al.* Tissue fluidity promotes epithelial wound healing. *Nat. Phys.* **15**, 1195–  
406 1203 (2019).
- 407 19. Mongera, A. *et al.* A fluid-to-solid jamming transition underlies vertebrate body axis  
408 elongation. *Nature* **561**, 401–405 (2018).



- 409 20. Lawton, A. K. *et al.* Regulated tissue fluidity steers zebrafish body elongation.  
410 *Development* **140**, 573–582 (2013).
- 411 21. Petridou, N. I., Grigolon, S., Salbreux, G., Hannezo, E. & Heisenberg, C.-P. Fluidization-  
412 mediated tissue spreading by mitotic cell rounding and non-canonical Wnt signalling. *Nat.*  
413 *Cell Biol.* **21**, 169–178 (2019).
- 414 22. Bi, D., Lopez, J. H., Schwarz, J. M. & Manning, M. L. A density-independent rigidity  
415 transition in biological tissues. *Nat. Phys.* **11**, 1074–1079 (2015).
- 416 23. Bi, D., Yang, X., Marchetti, M. C. & Manning, M. L. Motility-Driven Glass and Jamming  
417 Transitions in Biological Tissues. *Phys. Rev. X* **6**, 021011 (2016).
- 418 24. Yang, X. *et al.* Correlating cell shape and cellular stress in motile confluent tissues. *Proc.*  
419 *Natl. Acad. Sci.* **114**, 12663–12668 (2017).
- 420 25. Wang, X. *et al.* Anisotropy links cell shapes to a solid-to-fluid transition during convergent  
421 extension. <http://biorxiv.org/lookup/doi/10.1101/781492> (2019).
- 422 26. Smutny, M., Behrndt, M., Campinho, P., Ruprecht, V. & Heisenberg, C.-P. UV laser  
423 ablation to measure cell and tissue-generated forces in the zebrafish embryo in vivo and  
424 ex vivo. *Methods Mol. Biol.* 1189 219–235 (Springer New York, 2014).
- 425 27. Merkel, M. *et al.* Triangles bridge the scales: Quantifying cellular contributions to tissue  
426 deformation. *Phys. Rev. E* **95**, 032401 (2017).
- 427 28. Münster, S. *et al.* Attachment of the blastoderm to the vitelline envelope affects  
428 gastrulation of insects. *Nature* **568**, 395–399 (2019).
- 429 29. Firmino, J., Rocancourt, D., Saadaoui, M., Moreau, C. & Gros, J. Cell Division Drives  
430 Epithelial Cell Rearrangements during Gastrulation in Chick. *Dev. Cell* **36**, 249–261  
431 (2016).
- 432 30. Fernandez-Gonzalez, R., Simoes, S. de M., Röper, J.-C., Eaton, S. & Zallen, J. A. Myosin  
433 II Dynamics Are Regulated by Tension in Intercalating Cells. *Dev. Cell* **17**, 736–743  
434 (2009).
- 435 31. Kobb, A. B. & Zulueta-Coarasa, T. Tension regulates myosin dynamics during *Drosophila*  
436 embryonic wound repair. *J. of Cell Sci.* **130**, 689–696 (2017).
- 437 32. Zulueta-Coarasa, T. & Fernandez-Gonzalez, R. Dynamic force patterns promote  
438 collective cell movements during embryonic wound repair. *Nat. Phys.* **14**, 750–758 (2018).
- 439 33. Hashimoto, H., Robin, F. B., Sherrard, K. M. & Munro, E. M. Sequential Contraction and  
440 Exchange of Apical Junctions Drives Zippering and Neural Tube Closure in a Simple  
441 Chordate. *Dev. Cell* **32**, 241–255 (2015).
- 442 34. Brown, S. J. *et al.* The Red Flour Beetle, *Tribolium castaneum* (Coleoptera): A Model for  
443 Studies of Development and Pest Biology. *Cold Spring Harbor Protocols* **8**, pdb.emo126  
444 (2009).
- 445 35. Sarrazin, A. F., Peel, A. D. & Averof, M. A Segmentation Clock with Two-Segment  
446 Periodicity in Insects. *Science* **336**, 338–341 (2012).
- 447 36. Gurska, D., Jentzsch, I. & Panfilio K.A. Mutual regulation underlies paralogue functional  
448 diversification. [biorxiv.org. doi:10.1101/427245](http://biorxiv.org/doi/10.1101/427245), (2018).
- 449 37. Schmied, C. & Tomancak, P. Sample Preparation and Mounting of *Drosophila* Embryos  
450 for Multiview Light Sheet Microscopy. *Methods Mol. Biol. Clifton NJ* **1478**, 189–202 (2016).
- 451 38. Wolff, C. *et al.* Multi-view light-sheet imaging and tracking with the MaMuT software  
452 reveals the cell lineage of a direct developing arthropod limb. *Elife* **7**, 375 (2018).

- 453 39. Grill, S. W., Gönczy, P., Stelzer, E. H. K. & Hyman, A. A. Polarity controls forces governing  
454 asymmetric spindle positioning in the *Caenorhabditis elegans* embryo. *Nature* **409**, 630–  
455 633 (2001).
- 456 40. Mayer, M., Depken, M., Bois, J. S., Jülicher, F. & Grill, S. W. Anisotropies in cortical  
457 tension reveal the physical basis of polarizing cortical flows. *Nature* **467**, 617–621 (2010).
- 458 41. Preibisch, S., Saalfeld, S., Schindelin, J. & Tomancak, P. Software for bead-based  
459 registration of selective plane illumination microscopy data. *Nat. Methods* **7**, 418–419  
460 (2010).
- 461 42. Schindelin, J. *et al.* Fiji: an open-source platform for biological-image analysis. *Nat.*  
462 *Methods* **9**, 676–682 (2012).
- 463 43. Schmied, C., Steinbach, P., Pietzsch, T., Preibisch, S. & Tomancak, P. An automated  
464 workflow for parallel processing of large multiview SPIM recordings. *Bioinformatics* **32**,  
465 1112–1114 (2016).
- 466 44. Schmidt, U., Weigert, M., Broaddus, C. & Myers, G. Cell Detection with Star-Convex  
467 Polygons. in *Medical Image Computing and Computer Assisted Intervention* 11071 265–  
468 273 (Springer International Publishing, 2018).
- 469  
470

471 **Figure 1**

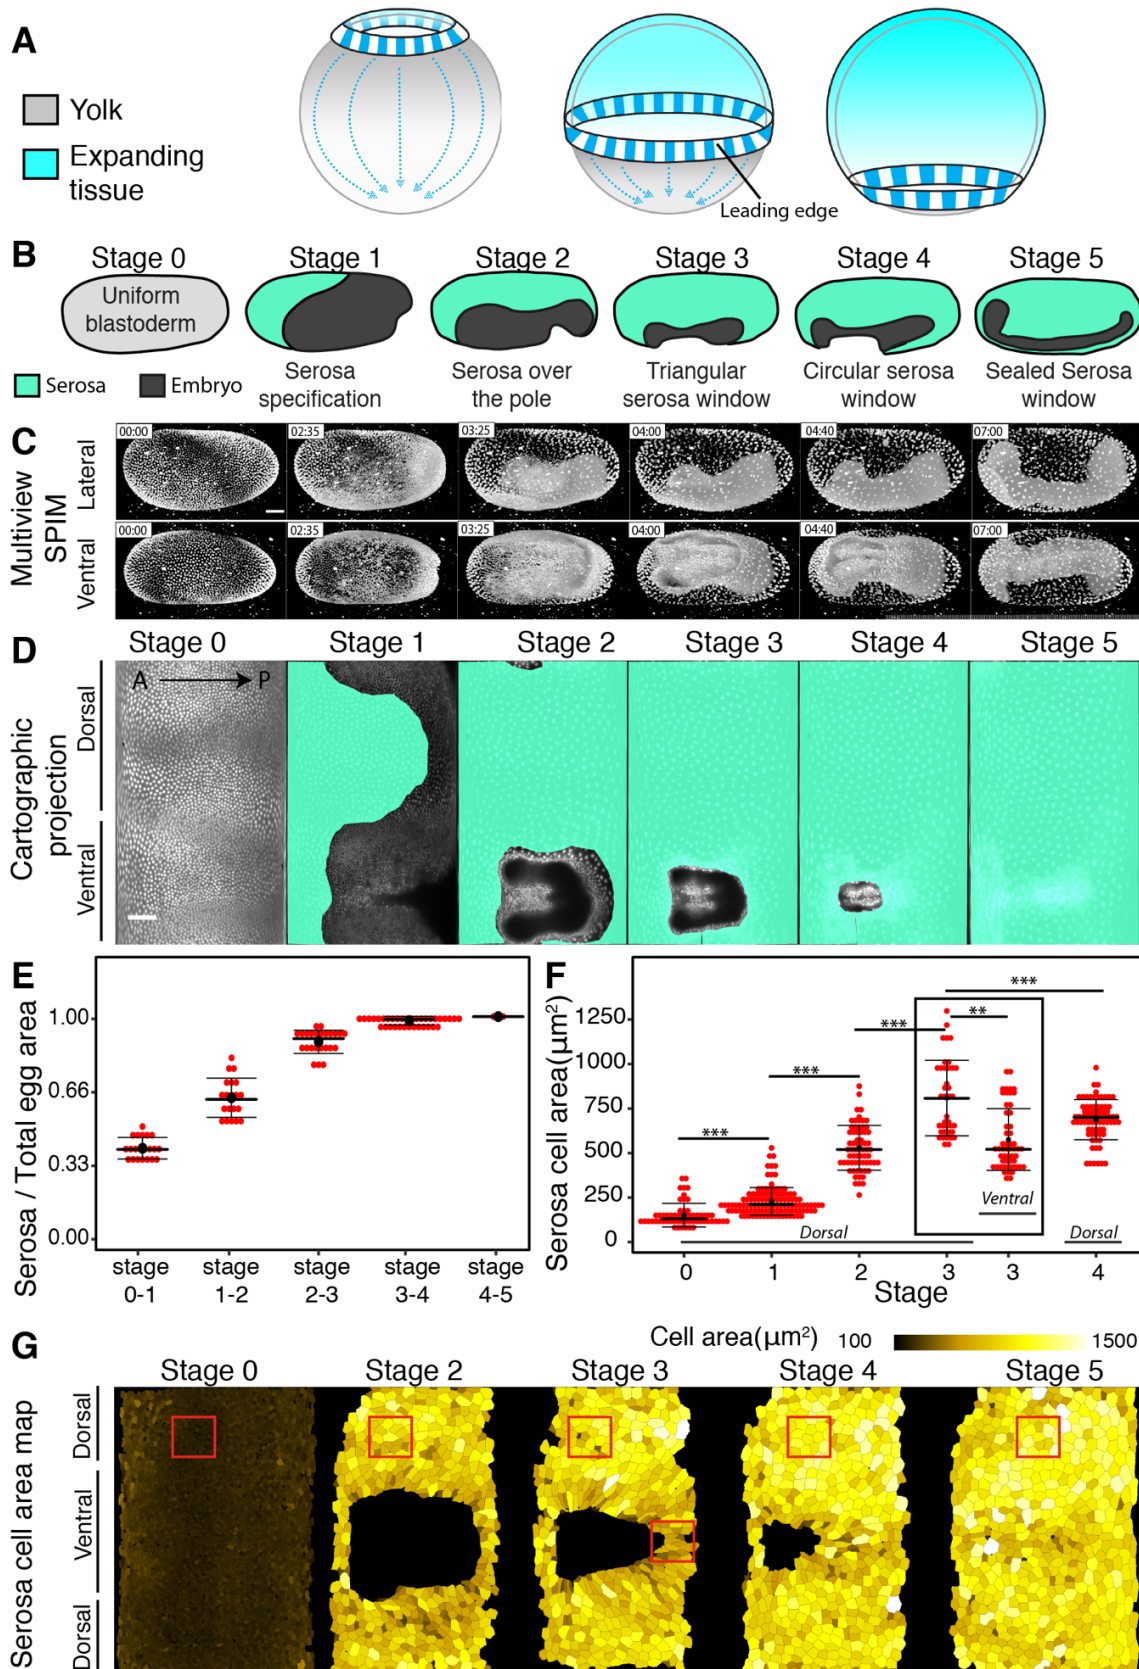

472

473 **Figure 1: Inhomogeneous tissue expansion during *Tribolium* serosa morphogenesis.**

474 (A) Schematic depiction of the geometric constraints experienced by a tissue expanding over a  
475 spherical yolk cell. The leading edge undergoes an area increase followed by an area decrease  
476 after it crosses the equator.

477 (B) Illustrations of the stages of *Tribolium* embryogenesis from cellular blastoderm to serosa  
478 window closure.

479 (C) 3D rendered reconstructed multi-view time-lapse SPIM recording of a *Tribolium* embryo  
480 expressing the fluorescent EFA:nGFP nuclear marker. The embryo is shown from the lateral and  
481 ventral view at the 6 reference stages corresponding to the schematics in (B). All imaged  
482 embryos in this and other panels are shown with anterior to the left and all time stamps are in  
483 hours: minutes. Scale bar is 50  $\mu\text{m}$ .

484 (D) 2D cartographic projection of a 4D SPIM recording of *Tribolium* embryo expressing  
485 EFA:nGFP. The extent of the serosa tissue is highlighted in turquoise. Scale bar is approximately  
486 (see Methods) 100  $\mu\text{m}$ .

487 (E) The area of the serosa tissue calculated from cartographic projections of 4D SPIM recordings.  
488 The data are normalized to the total serosa area at stage 5 in each case. For every stage the  
489 total serosa area is calculated for all timepoints between two consecutive stages in three different  
490 embryos and plotted as a distribution. Plots in this and all other panels indicate the median with  
491 a thick line, the mean with a black dot and the standard deviation with the thin error bars

492 (F) Comparison of the distributions of apical areas of cells sampled from point scanning confocal  
493 recordings of *Tribolium* embryos expressing LifeAct-eGFP membrane marker at reference stages  
494 labeled according to (B). The number of cells (n) and the number of embryos (N) sampled at  
495 different stages were as follows: In the dorsal region, Stage 0 n=58, N=6, Stage 1 n=116, N=11,  
496 Stage2 n=66, N=9, Stage 3 n=39, N=6, Stage 4 n=76, N=10 and Stage 3 ventral n= 52, N=7. The  
497 difference between distributions was tested using unpaired Welch's t-tests (same for all Figures  
498 unless stated otherwise). P-values between 0.05-0.01 are labelled with \*, 0.009-0.001 are labeled  
499 with \*\*, <0.001 with \*\*\* and ns signify non-significant p-values (same for all Figures).

500 (G) Cartographic projections of reference stages of an embryo labelled with LifeAct-eGFP and  
501 imaged live with multi-view SPIM. The projections are overlaid with manually curated automated  
502 segmentation results visualizing apical areas of serosa cells through a color code. Red boxes  
503 indicate the approximate regions from which cells were sampled in confocal datasets quantified  
504 in (F).

505



506 **Figure 2**

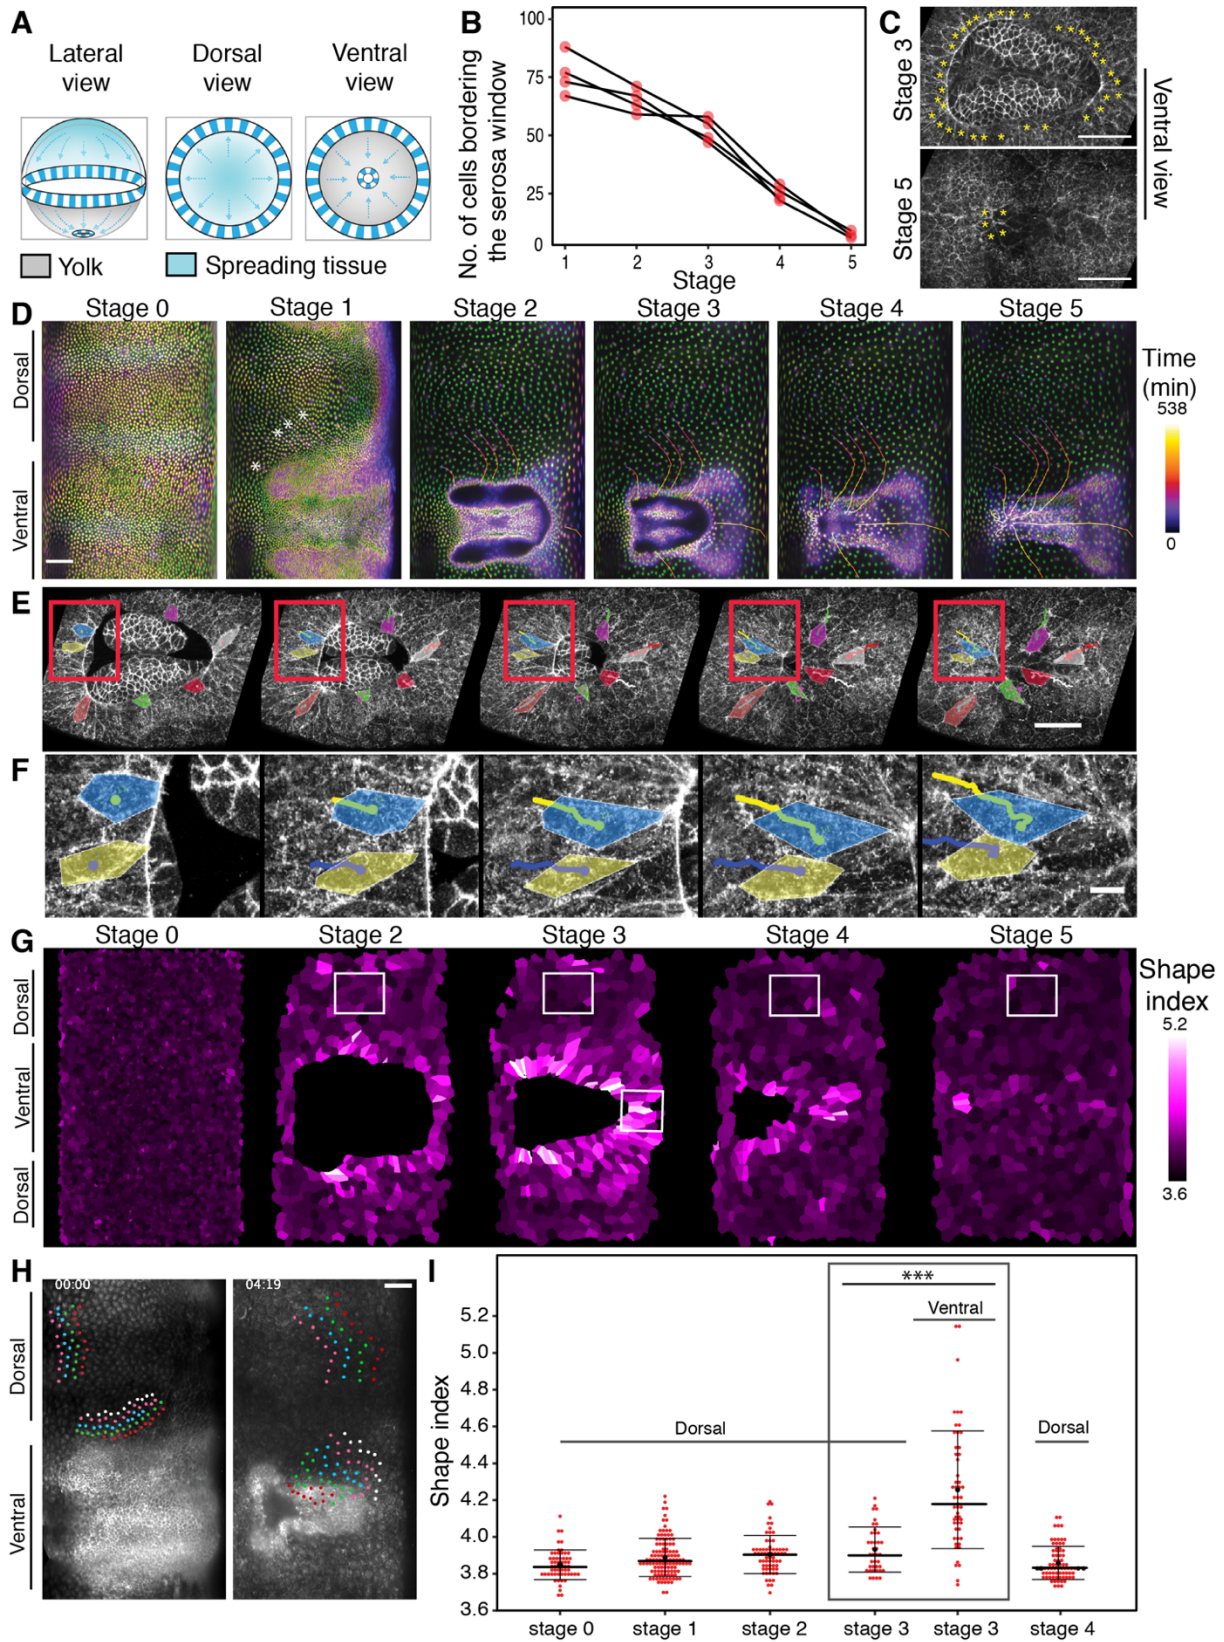

507

508 **Figure 2: Cell behaviors at the ventral leading edge of the serosa window are distinct from**  
509 **the behaviors in dorsal serosa.**

510 (A) Schematic illustration of the putative mechanism of closing serosa window by reducing the  
511 number of cells at the leading edge of the window over time.

512 (B) Plot of the total number of cells at the embryo-serosa boundary during serosa window closure  
513 counted at the five reference stages. (N=4)

514 (C) Confocal images highlighting the cells (yellow asterisks) forming the leading edge of the  
515 serosa window at Stage 3 (top) and Stage 5 (bottom). Scale bar is 10  $\mu\text{m}$ .

516 (D) Cartographic projection of a Histone-eGFP labelled embryo imaged with multi-view SPIM.  
517 The progressively deeper onion layers of the projection are color-coded to distinguish superficial  
518 and internal nuclei. The nuclei participating in closing of the serosa window were back-tracked  
519 to the uniform blastoderm stage to reveal their spatial origin. Tracks are color-coded by time as  
520 indicated by the color scale. Scale bar is approximately 100  $\mu\text{m}$ .

521 (E) Frames from a confocal recording of the serosa window closure in embryos expressing  
522 LifeAct-eGFP. Selected cells at the leading edge of the serosa window are outlined and colored  
523 to show that some cells shrink their serosa-window-facing membranes and planarly intercalate  
524 into the serosa epithelium. Red box marks the inset shown in (F). Scale bar is 50  $\mu\text{m}$  in (E) and  
525 10  $\mu\text{m}$  in (F).

526 (G) Cartographic projections of an embryo labelled with LifeAct-eGFP, imaged in SPIM and  
527 semi-automatically segmented. The color code indicates the value of the shape index for each  
528 segmented serosa cell. White boxes indicate the approximate regions from which cells were  
529 sampled in confocal datasets quantified in (I).

530 (H) Cartographic projections of an embryo labelled with LifeAct-eGFP at the beginning (left) and  
531 towards the end (right) of serosa window closure. Selected cells were tracked over time and color  
532 coded to visualize the difference in the extent of neighbor exchanges between the dorsal cells  
533 and ventral cells close to the leading edge of the serosa widow. Scale bar is approximately 100  
534  $\mu\text{m}$ .

535 (I) Distributions of shape indices of cells segmented from Stage 0-4 LifeAct-eGFP embryos  
536 imaged by point scanning confocal. Numbers of cells and embryos are the same as in 1F.



537 **Figure 3**

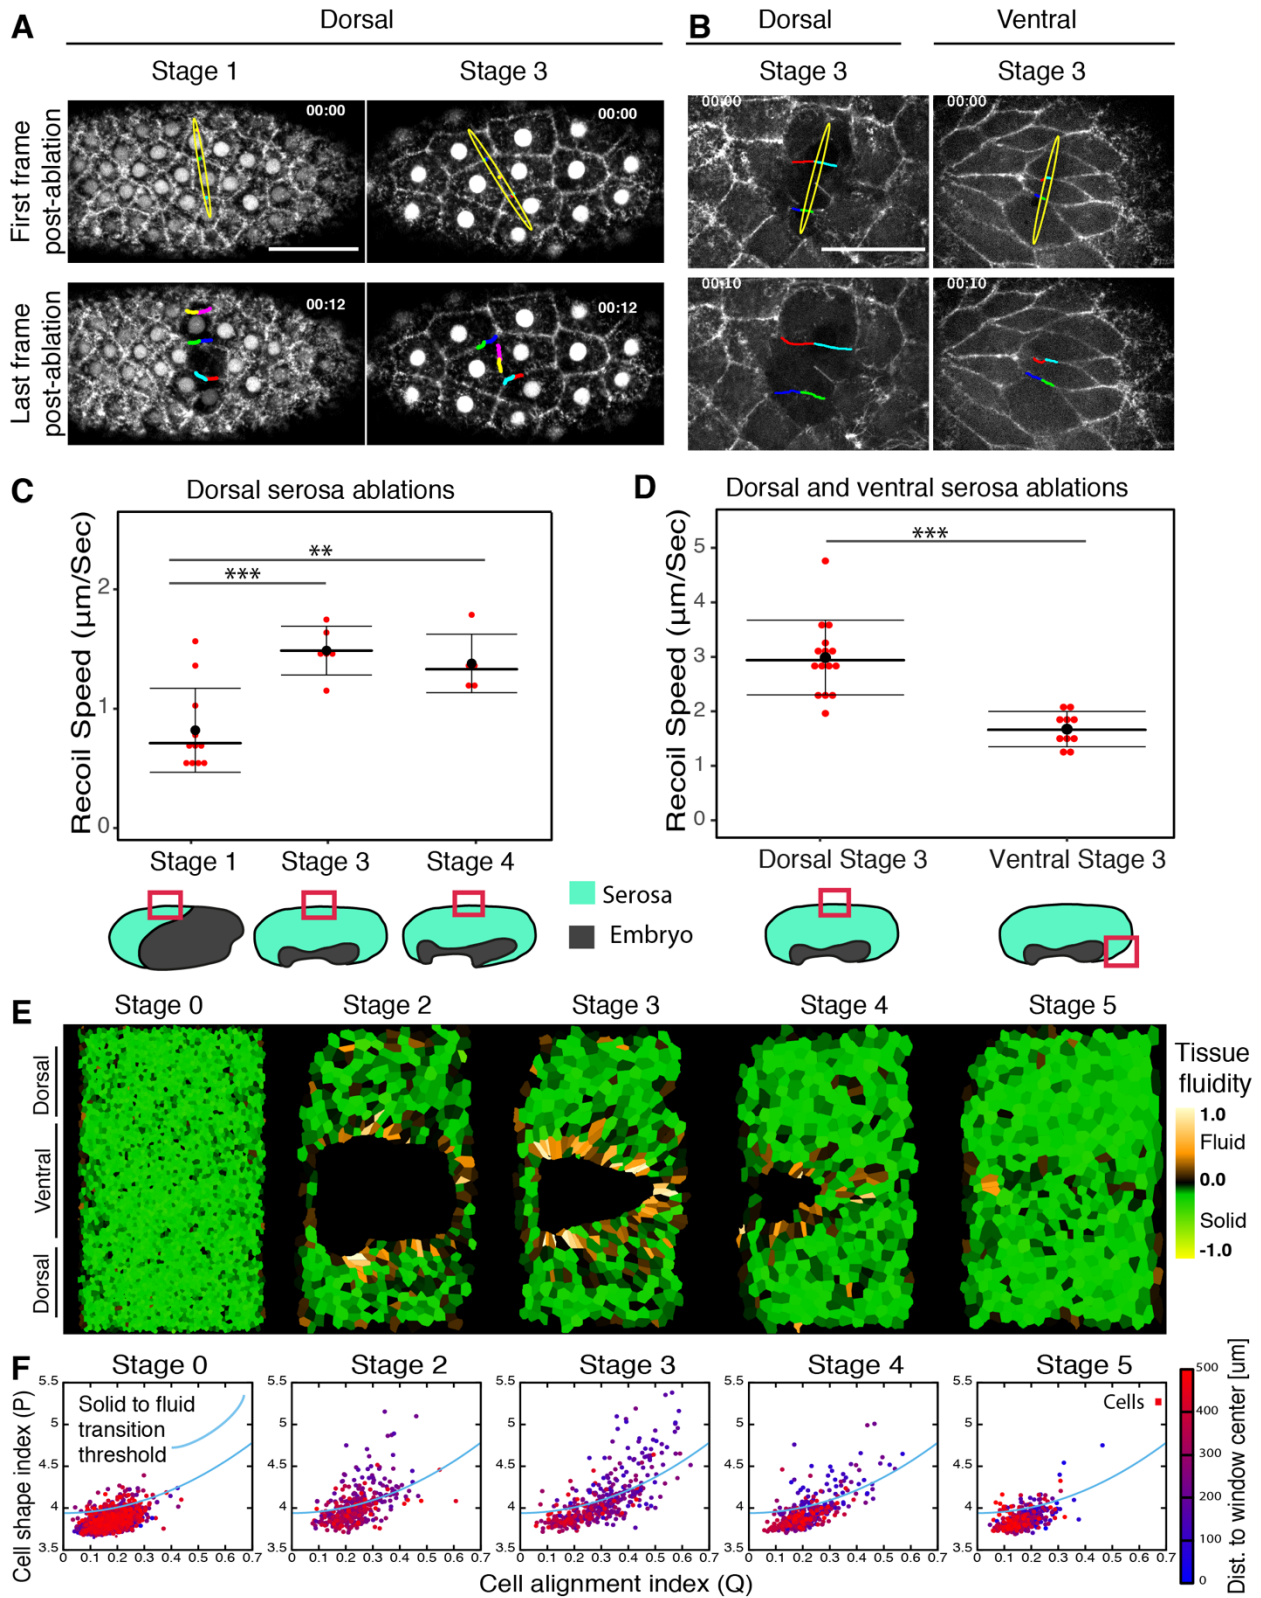

538

539 **Figure 3: Tension landscape in the expanding serosa**

540 (A) Tissue laser ablations in the dorsal serosa at different reference stages. Images show the  
541 serosal tissue before (top) and after (bottom) laser ablation in the dorsal region of the embryo  
542 expressing LifeAct-eGFP and EFA:nGFP at Stage 1 and Stage 3. The yellow ellipses show the  
543 extent of the cut. The colored lines highlight the displacement of the severed cell edges. Scale  
544 bar is 50  $\mu\text{m}$ .

545 (B) Comparison of laser ablation in dorsal and ventral regions of the serosa (as depicted  
546 schematically below the graph in (D)) at stage 3 in distinct embryos expressing LifeAct-eGFP.  
547 The yellow ellipse shows the extent of the cut. Scale bar is 50  $\mu\text{m}$ .

548 (C) Graph shows comparison of recoil velocities after laser ablation at Stages 1, 3 and 4. The  
549 ablations were performed at the same dorsal position of each embryo as indicated by the red box  
550 in the reference stage schematics below. Each dot represents one cut in one embryo. The number  
551 of embryos (N) sampled at different stages were as follows: Stage 1 N=11, Stage 3 N = 6, Stage  
552 4 N = 5.

553 (D) Graph shows comparison of recoil velocities after laser ablation of serosal cells in the dorsal  
554 and the ventral regions of Stage 3 embryos. The red boxes in the embryo illustrations below the  
555 graphs indicate the position of the dorsal and ventral cuts for the data shown in (B) and (D). Each  
556 dot represents one cut in one embryo. The number of embryos (N) sampled were as follows:  
557 Dorsal N=15, Ventral N = 10.

558 (E) Cartographic projections of an embryo labelled with LifeAct-eGFP, imaged in SPIM and semi-  
559 automatically segmented. The color code indicates the tissue fluidity measured by subtracting  
560 the local solid-to-fluid transition shape index threshold (blue curve in (F)) from the cell shape  
561 index for each segmented cell (see methods). Positive values indicate fluid-like tissue while  
562 negative values indicate a solid-like tissue.

563 (F) Scatter plot of cell shape alignment index (x-axis) and shape index (y-axis) values of  
564 individual cells in the maps shown in (E). The cells are color coded according to their distance  
565 from the center of the serosa window. The blue line indicates theoretically predicted threshold  
566 value of shape index signifying solid-to-fluid structural transition. Points below the line indicate  
567 solid-like cells and points above the line fluid-like cells.

568

569 **Figure 4**

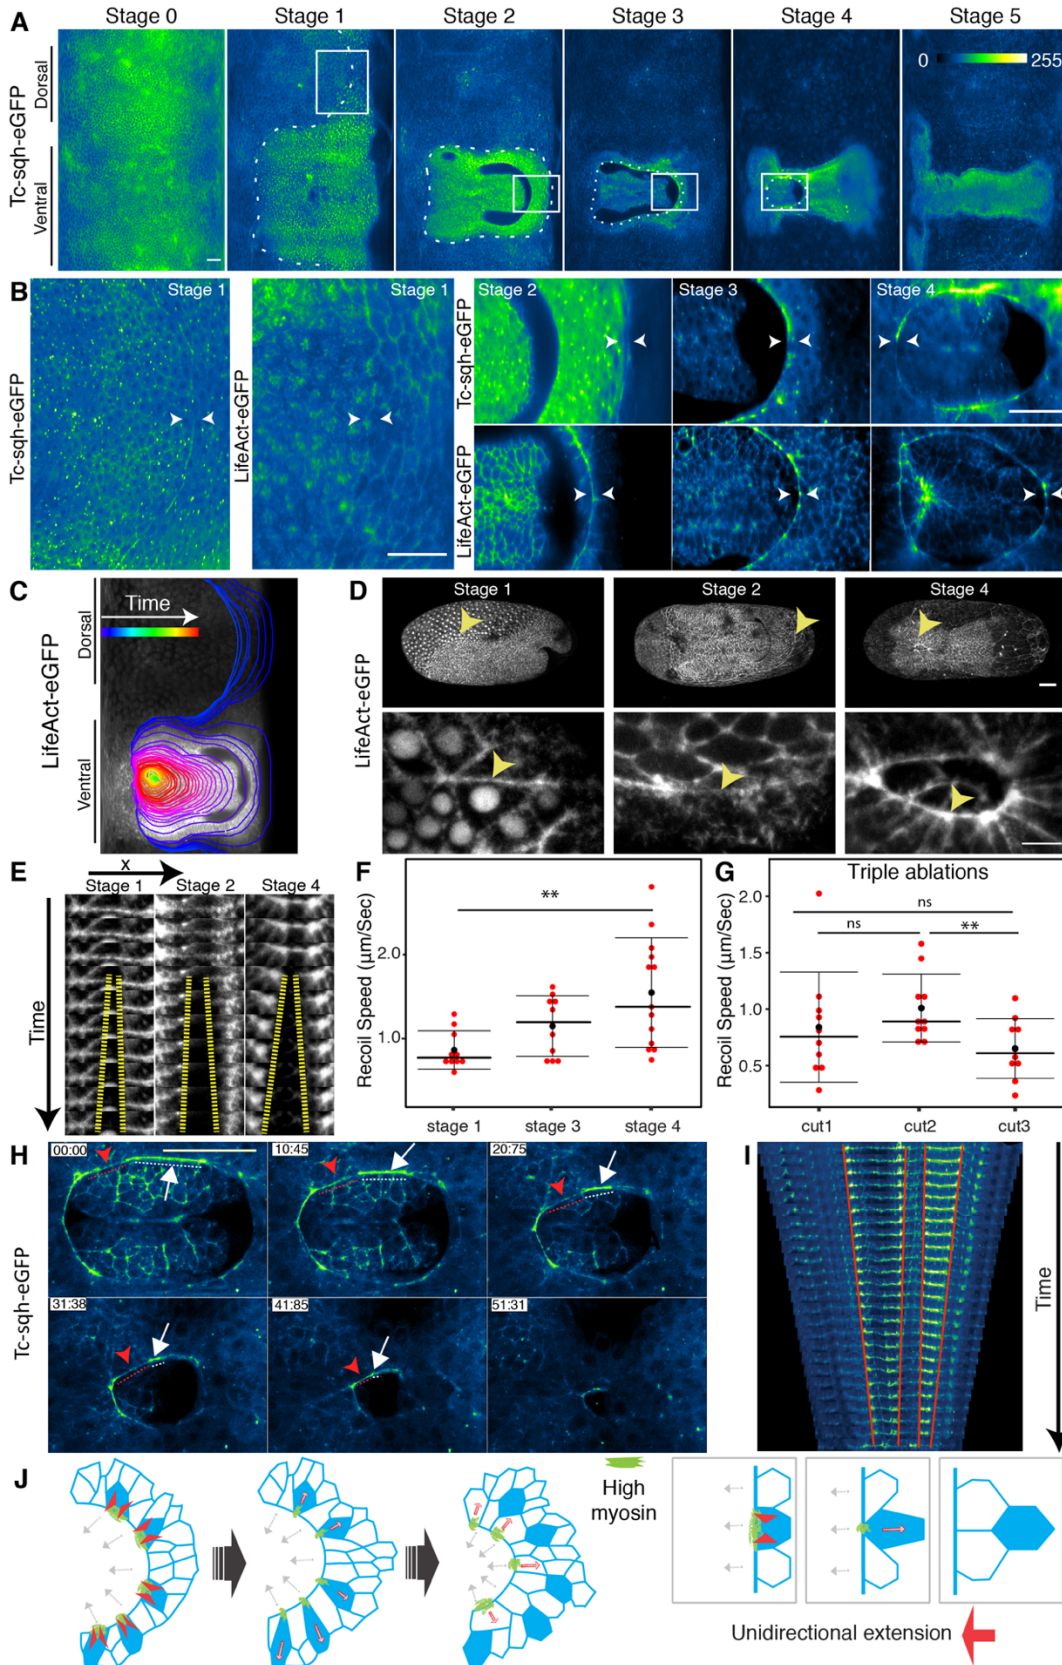

570



571 **Figure 4: Emergence of a heterogeneous actomyosin cable at the serosa-embryonic**  
572 **boundary promotes cell eviction during serosa window closure.**

573 (A) Cartographic projection of *Tribolium* embryos injected with Tc-sqh-eGFP and imaged with  
574 multi-view SPIM. The accumulation of myosin at the border between serosa and embryos is  
575 highlighted by the dotted line as it emerges around the egg circumference (Stage 1) and then  
576 during its progressive constriction on the ventral side of the embryo (Stages 2-5). Scale bar is  
577 approximately 50  $\mu\text{m}$ .

578  
579 (B) Inset shows zoomed in images of Tc-sqh-eGFP localization in the regions marked by white  
580 boxes in (A) and images from cartographic projections of an embryo injected with LifeAct-eGFP  
581 mRNA and imaged with multi-view SPIM.

582 (C) The shape of the supracellular actomyosin cable in map projected LifeAct-eGFP SPIM  
583 recording is outlined over time as it emerges dorsally and closes on the ventral side of the embryo.  
584 The color of the outline corresponds to the time stamp of the frame from which it was traced.

585 (D) Maximum intensity projections of confocal stacks of LifeAct-eGFP injected embryos from 3  
586 different developmental stages. Arrowheads points to the regions of the cable that was ablated.  
587 Stage 1 images are lateral views and Stage 2 and 4 images ventral views. Bottom row shows  
588 close ups of areas marked by arrows in the top row. Scale bar in top panel is 50  $\mu\text{m}$  and 10  $\mu\text{m}$   
589 in the bottom panels.

590 (E) Kymograph of the recoiling membrane edges (yellow hyphen) after laser ablation of the cells  
591 forming the actomyosin cable at the leading edge of the serosa window.

592 (F) The distributions of recoil velocities after ablation of the cable-forming cells at different stages  
593 ( $n > 10$ ).

594 (G) The distributions of recoil velocities after three successive laser ablations of three distinct  
595 cable-forming cell edges in a single cable at Stage 4 ( $n > 10$ ). Statistical significance determined  
596 by paired t-test.

597 (H) Images from a timelapse point scanning confocal recording of an embryo expressing Tc-sqh-  
598 eGFP. Myosin localization at the cable is different between different cable forming cells. Cell with  
599 high myosin accumulation is labelled with white arrow and its extent is highlighted with white  
600 dotted line. Cell with low myosin is labelled similarly but in red. Scale bar is 10  $\mu\text{m}$ .

601 (I) Kymograph of myosin cable shown in (I). The cable was segmented manually and straightened  
602 computationally in Fiji.

603 (J) Illustration shows the differential contraction of the serosa-window-facing cell edges  
604 depending on the amount of myosin. This leads to T1 transitions in the serosa (right). As a result,  
605 the leading edge of serosa extends unidirectionally and at the same time undergoes structural  
606 rearrangement. Green color depicts the myosin enriched in the contracting cells (red arrowheads).

607

608 **Figure 5**

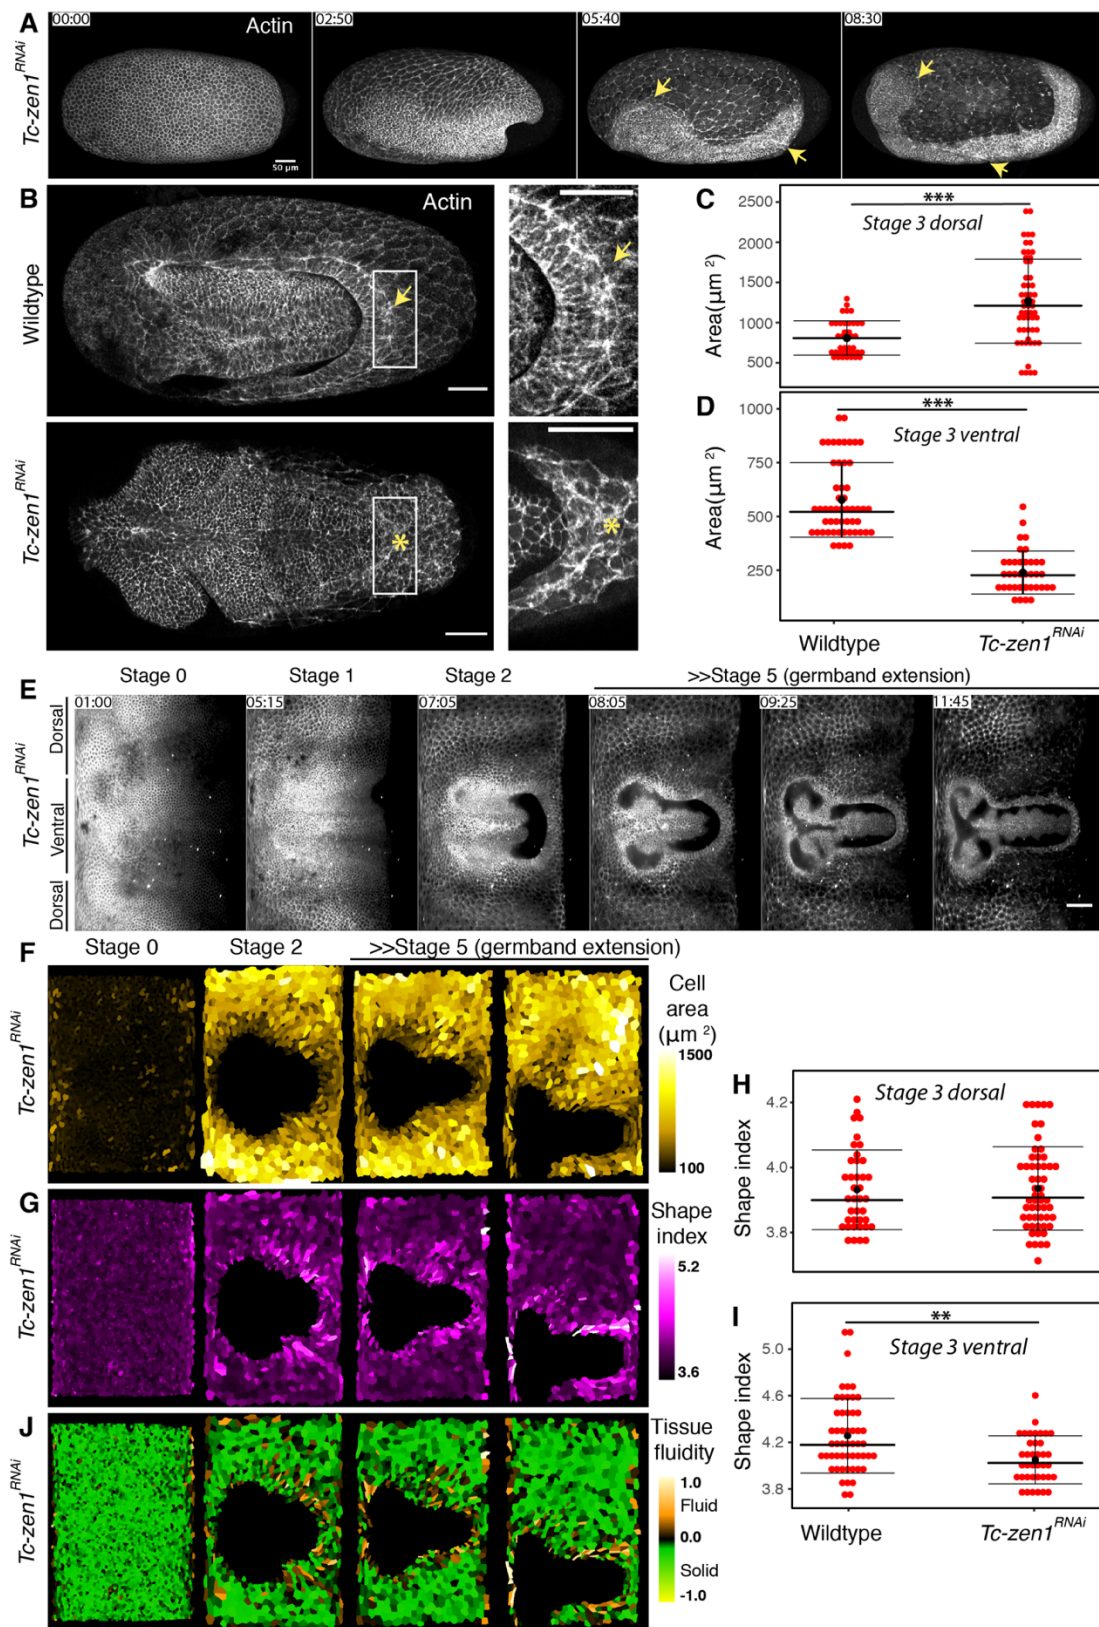

609  
 610

611 **Figure 5: Cell and tissue dynamics in *Tc-zen1* knockdown embryos**

612 (A) Maximum intensity projections of a developing embryo labelled with LifeAct-GFP, injected  
613 with dsRNA for *Tc-zen1* and imaged with point scanning confocal microscope. Arrows point to  
614 the open serosa window in the head and the posterior region. Scale bar is 50  $\mu\text{m}$ .

615 (B) Selected maximum intensity projection images from wildtype (top) and *Tc-zen1*<sup>RNAi</sup> (bottom)  
616 embryos at stage 3. Inset shows the cable in wildtype embryos (arrow) and absence of the cable  
617 in the knockdown (\*). Scale bar is 50  $\mu\text{m}$ .

618 (C) The distributions of cell areas in wildtype and *Tc-zen1* knockdown embryos sampled from  
619 confocal datasets in the ventral (C) and dorsal (D) serosa regions at Stage 3. The number of  
620 cells (n) and the number of embryos (N) sampled at different stages were as follows: In (C)  
621 wildtype n=39, N=6, *Tc-zen1*<sup>RNAi</sup> n=55, N=7, in (D) wildtype n= 52, N=7, *Tc-zen1*<sup>RNAi</sup> n=38, N=7,

622 (E) Cartographic projections of a reconstructed multi-view SPIM recording in which an embryo  
623 injected with Gap43-eYFP and *Tc-zen1* dsRNA was imaged from 5 angles every 5  
624 minutes. Scale bar is approximately 100  $\mu\text{m}$ .

625 (F) Cartographic projections shown in (E) overlaid with manually curated automated  
626 segmentation and colored according to the apical area of the segmented serosa cells.

627 (G) Cartographic projections shown in (E) overlaid with manually curated automated  
628 segmentation and colored according to the shape index of the segmented serosa cells.

629 (H) The distributions of shape indices in wildtype and *Tc-zen1* knockdown embryos sampled  
630 from confocal datasets in the dorsal (H) and ventral (I) serosa regions at Stage 3. Numbers of  
631 cells and embryos are the same as in panel (C).

632 (J) Cartographic projections shown in (E) overlaid with manually curated automated segmentation  
633 and colored according to the tissue fluidity (see methods) of the segmented serosa cells.

634



635 **Supplementary Figure 1**

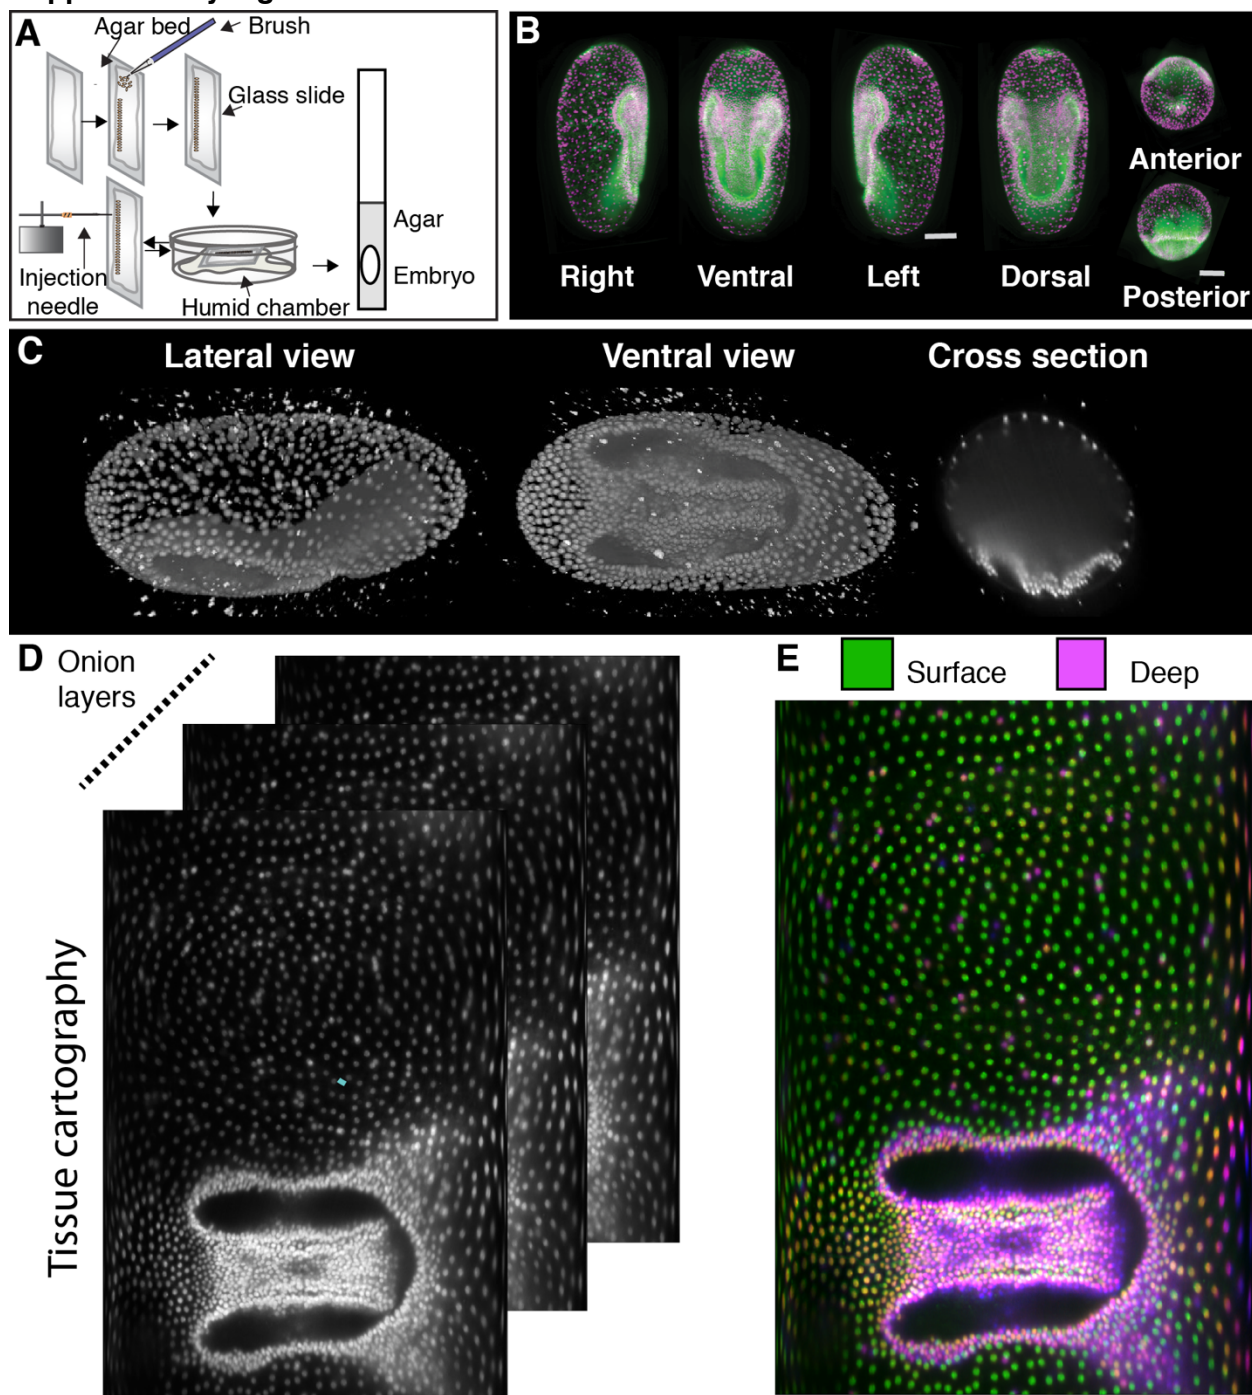

636

637 **Supplementary Figure 1: *Tribolium* embryo preparation, imaging and image analysis**  
638 **pipeline to study serosa epiboly**

639 (A) Illustration outlines the micro-injection and sample mounting protocol to label *Tribolium*  
640 embryos and mount them for lightsheet microscopy.

641 (B) Maximum intensity projections from different orientation of 3D images of embryos injected  
642 with LifeAct-eGFP and Histone-RFP. The embryo was imaged from 5 views with a light sheet  
643 microscope. Individual view stacks were registered and fused based on fluorescent beads  
644 scattered in the mounting medium (bright dots surrounding embryo) using Fiji Multi-view  
645 Reconstruction plugin.

646 (C) 3D rendering of Histone-eGFP expressing *Tribolium* embryo reconstructed from multi-view  
647 SPIM data and viewed from the ventral and lateral side. Sagittal cross section of the same  
648 embryo volume (right).

649 (D) The embryo shown in C is dimensionality reduced from 3D to 2D by generating a  
650 cartographic projection. Successive, increasingly deep concentric layers of the embryo surface  
651 are shown as separate maximum intensity projections.

652 (E) The different layers generated in (D) are color coded to separate the superficial serosa from  
653 the internalized embryo.

654

655 **Supplementary Figure 2**

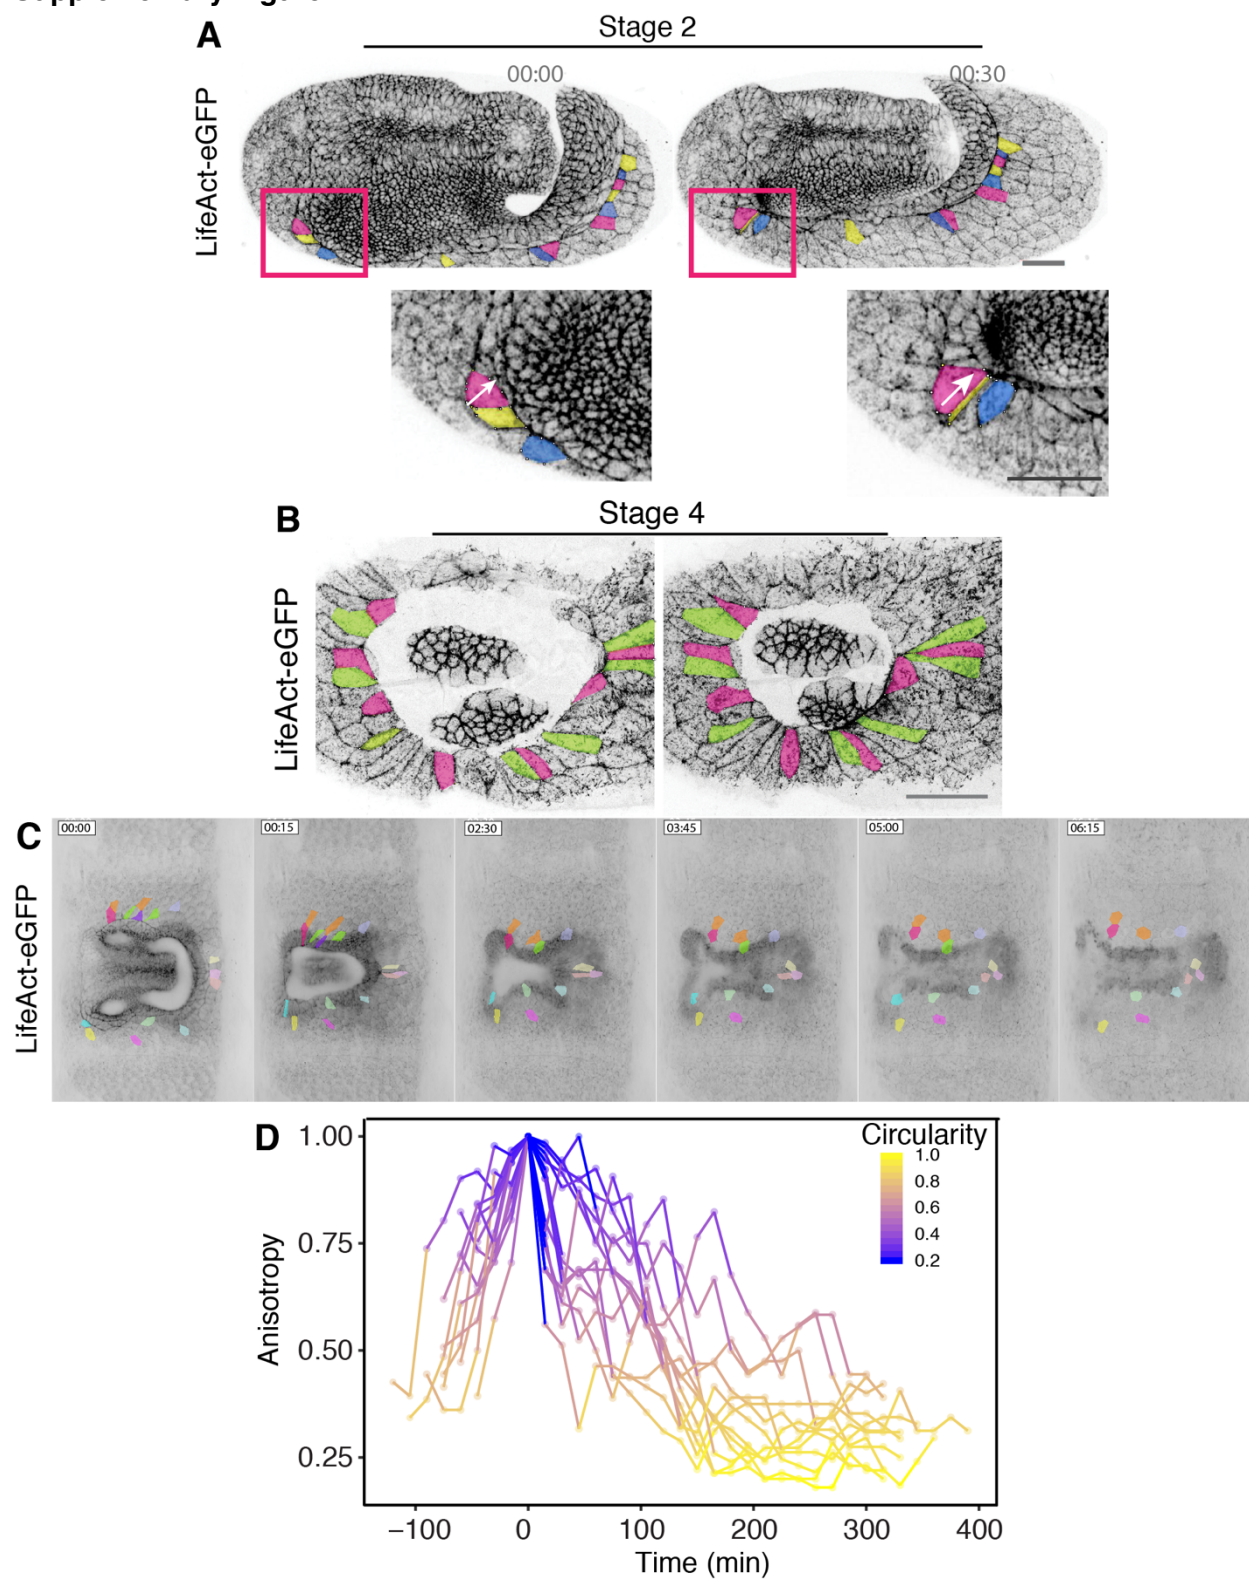

656  
657

658 **Supplementary Figure 2: Anisotropy of the cells at the leading edge of the serosa window**  
659 **increases over time and decreases once they leave the edge**

660 **(A)** Inverted confocal images of a Life-Act-eGFP expressing *Tribolium* embryos show selected  
661 cell outlines (highlighted in different colors) at the leading edge of the serosa window at Stage 2.  
662 Insets zoom in on regions highlighted with red boxes. Arrow points to a cell elongating along the  
663 axis roughly perpendicular to the leading edge. Scale bar is 50  $\mu\text{m}$ .

664 **(B)** Inverted confocal images similar to (A) of LifeAct-eGFP expressing *Tribolium* embryos show  
665 selected elongated cell outlines at the leading edge of the serosa window at Stage 4. Scale bar  
666 is 10  $\mu\text{m}$ .

667 **(C)** Inverted cartographic projections of LifeAct-eGFP expressing *Tribolium* embryos imaged with  
668 multi-view SPIM show outlines of selected anisotropically elongated cells during serosa window  
669 closure. The highlighted cells increase their shape anisotropy over time till they leave the leading  
670 edge of the serosa window and become hexagonal.

671 **(D)** Graph shows the change in anisotropy of cells highlighted in (C) over time. Anisotropy is  
672 defined as deviation from the circle that has circularity value of 1.

673



674 **Supplementary Figure 3**

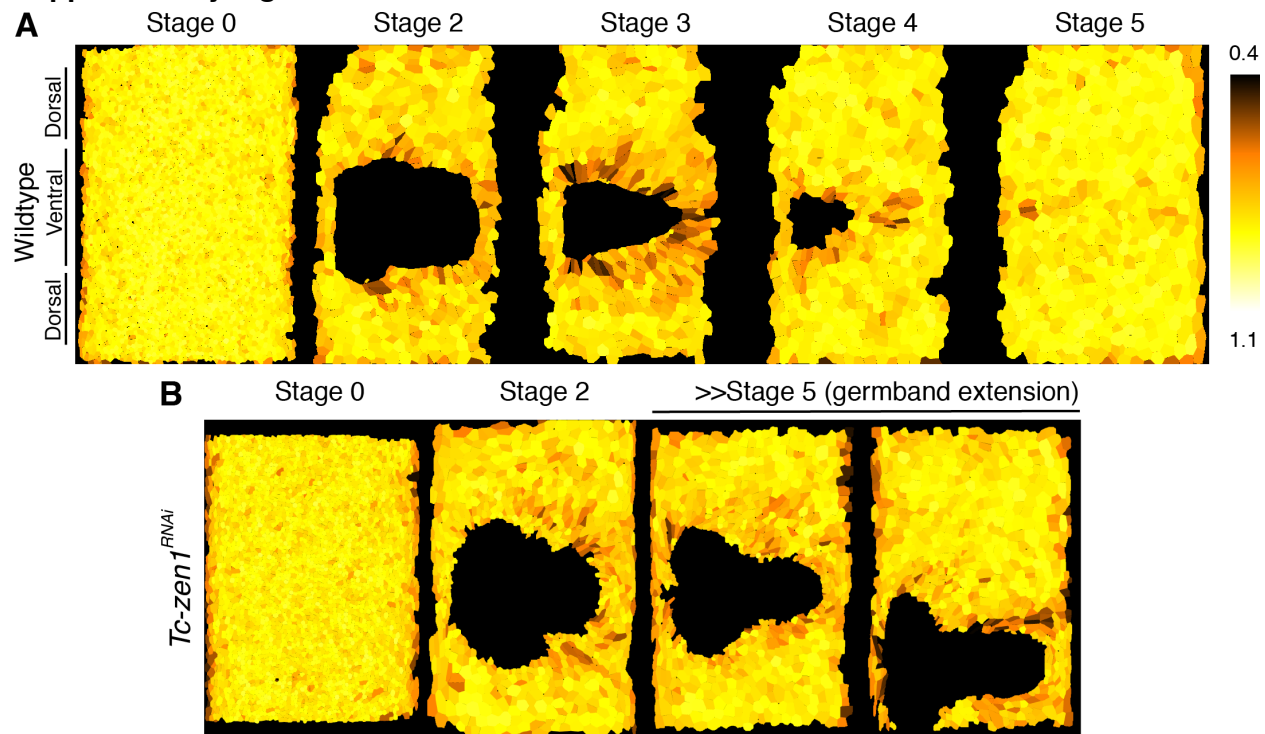

675  
676

677 **Supplementary Figure 3: Cell shape anisotropy in wildtype and *Tc-zen1*<sup>RNAi</sup> embryos**

678 (A) Cartographic projections of reference stages of wildtype embryo labelled with LifeAct-eGFP  
679 and imaged live with multi-view SPIM. The projections are overlaid with manually curated  
680 automated segmentation results visualizing anisotropy of serosa cells through a color code.  
681 Anisotropy is defined as deviation from the circle that has circularity value of 1.

682 (B) Cartographic projections of a multi-view SPIM recording in which embryos injected with  
683 Gap43-eYFP and *Tc-zen1* dsRNA was imaged from 5 angles every 5 minutes. The projections  
684 are color coded as in (A).

685

686 **Supplementary Figure 4**

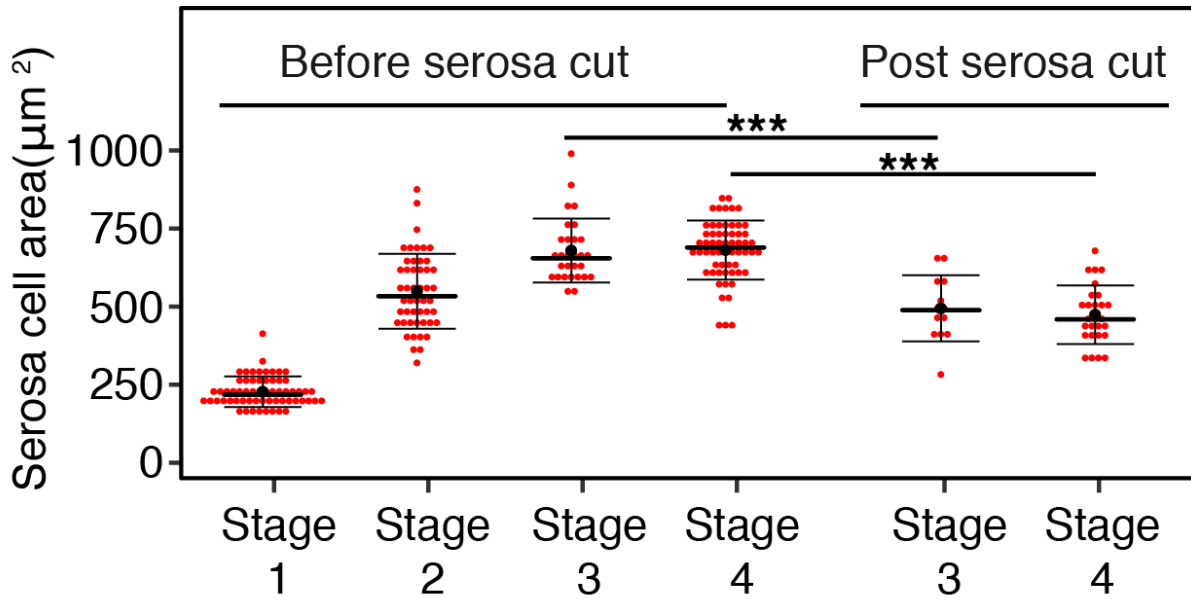

687

688 **Supplementary Figure 4: Contraction of cells after release in serosal tension**

689 Graph showing apical cell areas in the serosa before and after laser ablations at different  
690 reference stages. Intact cells neighboring the ablation site in embryos expressing LifeAct-eGFP  
691 were measured before and after laser cuts in the dorsal serosa.

692



693 **Supplementary Figure 5**

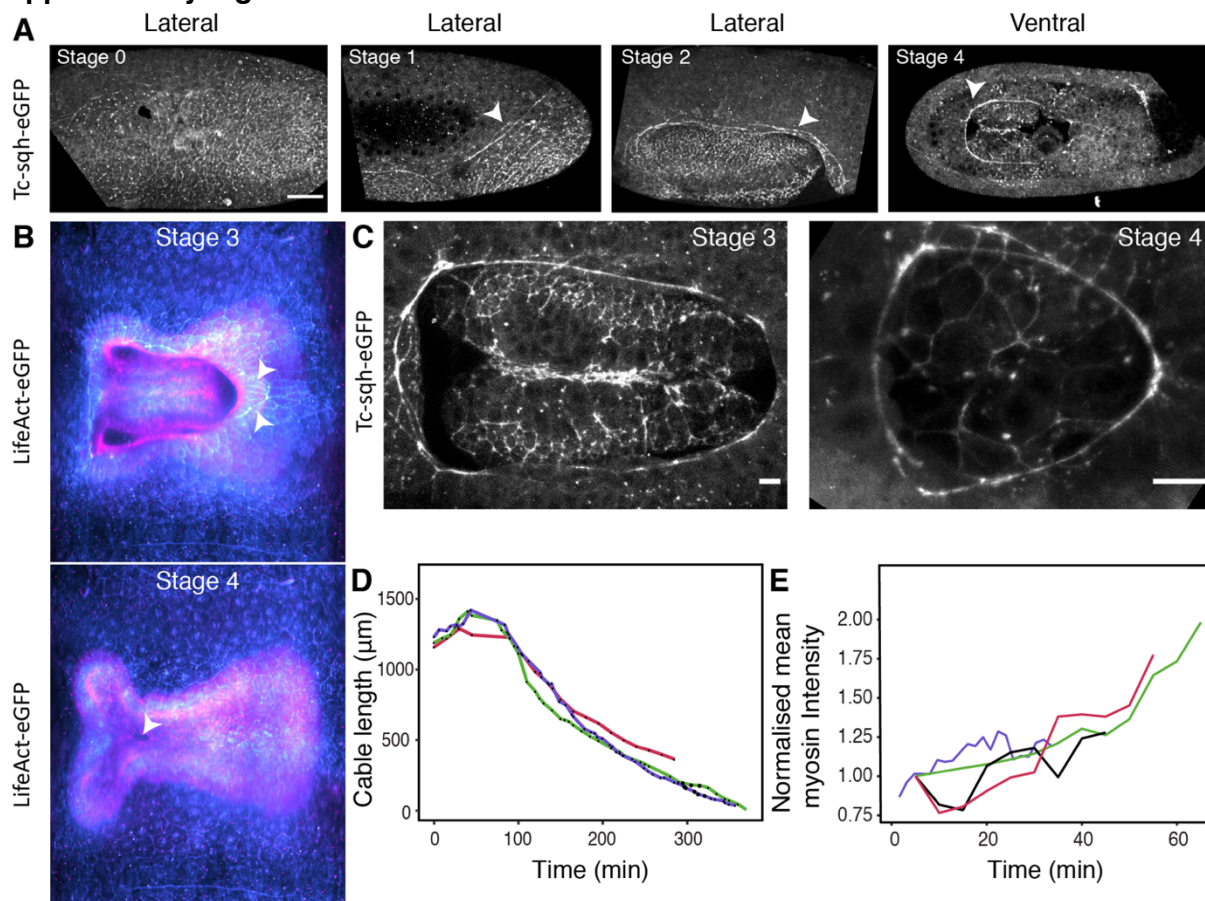

694  
695

696 **Supplementary Figure 5: Actomyosin localization at the embryo-serosa boundary**

697 **A)** Myosin localization in *Tribolium* embryo at different stages of gastrulation morphogenesis.  
698 Arrowheads point to the myosin cable. The embryos were injected with mRNA encoding Tc-sqh-  
699 eGFP and imaged with point scanning confocal microscope. Scale bar is  $50 \mu\text{m}$ .

700 **(B)** Images show the ventral region of a stage 3 and 4 embryo from a cartographic projection.  
701 The embryo was labeled with LifeAct-eGFP and imaged with multi-view SPIM. The different  
702 layers of the cartographic projection are colored with cyan for surface serosa and magenta for  
703 internal embryo layers. The arrowheads point to the actin cable at the serosa window leading  
704 edge at Stage 3.

705 **(C)** Confocal images show myosin enrichment at the embryo and serosa boundary at stage 3  
706 and stage 4. Scale bar is  $10 \mu\text{m}$ .

707  
708 **(D)** The graph shows the length of manually segmented actomyosin cable as a function of time  
709 during serosa window closure (N=3).

710  
711 **(E)** The graph shows mean myosin intensity normalized to the initial value at the manually  
712 segmented cable over time (N=4).

713 **Supplementary movies**

714 **Supplementary Movie 1:** Lateral and ventral views of 3D rendered multi-view Lightsheet  
715 recording of *Tribolium* embryo collected from a Histone-eGFP transgenic line. The embryo was  
716 imaged from 5 angles at 1.5 minute time interval at 22°C. Time stamp is hh:mm.

717

718 **Supplementary Movie 2:** The expanding serosa is outlined on a 2D cartographic projection of a  
719 4D SPIM recording of a transgenic embryo from the EFA-nGFP line marking cell nuclei. The color  
720 of the serosa changes according to its increasing total area. Time stamp is hh:mm.

721

722 **Supplementary Movie 3:** 4D multi-view lightsheet recording of a *Tribolium* embryo expressing  
723 EFA-nGFP nuclear marker projected as a 2D cartographic map. The embryo was imaged from 5  
724 angles at 1.5 minutes time interval. Successive onion layers of the map are color coded to  
725 distinguish deeper embryo layers from the superficial serosa. The last few cells contributing to  
726 the serosa window closure are tracked from Stage 1 onwards. Tracks are color-coded by time.  
727 Time stamp is hh:mm.

728

729 **Supplementary Movie 4:** Timelapse video shows Stage 4 to serosa window closure in a LifeAct-  
730 GFP labelled embryo imaged with point scanning confocal microscope. Selected cells at the  
731 cable are highlighted and tracked. Time stamp is hh:mm. Scale bar is 50  $\mu\text{m}$ .

732

733 **Supplementary Movie 5:** *Tribolium* embryo labelled with LifeAct-eGFP was imaged using 4D  
734 multi-view lightsheet microscopy and projected as a cartographic map. Dots and lines show two  
735 groups of serosal cells on the dorsal and ventral side of the embryo tracked over time using  
736 Mastodon Fiji Plugin. Time stamp is hh:mm.

737

738 **Supplementary Movie 6:** Cartographic projection of 4D multi-view lightsheet recording of an  
739 embryo injected with Tc-sqh-eGFP at 22°C. The dorsal part of the embryo is positioned in the  
740 middle to show the emergence of the myosin cable at Stage 1 (pointed out by an arrow). Time  
741 stamp is hh:mm.

742

743 **Supplementary Movie 7:** Timelapse videos of Stage 1, 3 and 4 embryos labelled with LifeAct-  
744 eGFP. The edges of serosa leading edge cells facing the serosa window (where cable-like actin  
745 enrichment occurs) were laser ablated and the edges were tracked with Fiji to measure the recoil  
746 velocity over time. Time stamp is mm:ss.

747

748 **Supplementary Movie 8:** Timelapse video of a Stage 4 transgenic embryo labelled with Tc-sqh-  
749 eGFP and imaged with a point scanning confocal microscope. The 3D stacks were maximum  
750 intensity projected. Myosin is distributed in a heterogeneous manner along the cable with different  
751 cell edges showing different intensities (highlighted using Green-Blue look-up table; green is high  
752 myosin). Time stamp is mm:ss.

753

754 **Supplementary Movie 9:** Timelapse video of an embryo labelled with LifeAct-eGFP in which *Tc-*  
 755 *zen1* was knocked down using parental RNAi. The embryo was imaged with a point scanning  
 756 confocal microscope and the 3D stacks were maximum intensity projected. Time stamp is hh:mm.

757  
 758 **Supplementary Movie 10:** Cartographic projection of a multi-view lightsheet dataset. The  
 759 embryo was injected with mRNA for GAP43-eYFP to label cell membranes and dsRNA to  
 760 knockdown *Tc-zen1*. Time stamp is hh:mm.

761  
 762 **Supplementary Movie 11:** Cartographic maps of serosal areas (Fig 1G), shape index (Fig 2G),  
 763 circularity (Supplementary Fig 3), fluidity (Fig 3E) back projected to the original 3D volume and  
 764 volumetric rendered them using Fiji.

765  
 766 **Supplementary Methods Table**

| Figure         | Fluorescent labeling of imaged embryo | xy pixel size (μm) | z step (μm) | Temporal resolution | Microscope used          | Injected/transgenic imaged embryo    |
|----------------|---------------------------------------|--------------------|-------------|---------------------|--------------------------|--------------------------------------|
| 1C             | H2A-eGFP                              | 0.38               | 2           | 2 min               | Zeiss Z1                 | Transgenic                           |
| 1D             | nGFP                                  | 0.38               | 2           | 90 sec              | Zeiss Z1                 | Transgenic                           |
| 1E             | H2A-eGFP OR nGFP OR GAP43-eYFP        | 0.38               | 2           | 90 sec              | Zeiss Z1                 | Transgenic                           |
| 1F, 2I         | LA-eGFP                               | 0.20               | 1.5         | NA                  | Zeiss 780                | Transgenic                           |
| 1G, 2G, 3E     | LA-eGFP OR Gap43-eYFP                 | 0.38               | 2           | 90 sec              | Zeiss Z1                 | Transgenic, Injected                 |
| 2B             | H2A-eGFP OR nGFP OR LA-eGFP           | 0.38               | 2           | 90-120 sec          | Zeiss Z1                 | Transgenic, Injected                 |
| 2C, 2E, 2F     | LA-eGFP                               | 0.20               | 1           | 2 min               | Zeiss 780                | Transgenic                           |
| 2D             | H2A-eGFP                              | 0.38               | 2           | 90 sec              | Zeiss Z1                 | Transgenic                           |
| 2H             | LA-eGFP                               | 0.38               | 2           | 90 sec              | Zeiss Z1                 | Injected                             |
| 3A, 3C         | LA-eGFP + nGFP                        | 0.20               | 1.5         | 2.6 sec             | Zeiss 780                | Transgenic                           |
| 3B, 3D         | LA-eGFP                               | 0.2267             | NA          | 0.5 sec             | Custom UV ablation setup | Transgenic                           |
| 4A             | Tc-sqh-eGFP                           | 0.38               | 2           | 5 min               | Zeiss Z1                 | Injected                             |
| 4B             | Tc-sqh-eGFP, LA-eGFP                  | 0.38               | 2           | 5 min, 90 sec       | Zeiss Z1                 | Injected                             |
| 4C             | LA-eGFP                               | 0.38               | 2           | 90 sec              | Zeiss Z1                 | Transgenic                           |
| 4D, 4E, 4F     | LA-eGFP                               | 0.55 OR 0.08       | 2 OR 1.5    | 1.6 sec             | Zeiss 780                | Transgenic                           |
| 4G             | LA-eGFP                               | 0.10               | 1           | 2.5 sec             | Zeiss 780                | Transgenic                           |
| 4H, 4I         | Tc-sqh-eGFP                           | 0.11               | 2           | 14.3 sec            | Zeiss 780                | Transgenic                           |
| 5A             | LA-eGFP                               | 0.47               | 2.5         | 5 min               | Zeiss 780                | Transgenic, pupal injection for RNAi |
| 5B             | LA-eGFP (WT)                          | 0.55               | 2           | NA                  | Zeiss 780                | Transgenic                           |
|                | LA-eGFP (Tc-zen1 RNAi)                | 0.33               | 2           | NA                  | Zeiss 780                | Transgenic, pupal injection for RNAi |
| 5 C, 5H        | LA-eGFP                               | 0.33               | 1           | NA                  | Zeiss 780                | Transgenic, pupal injection for RNAi |
| 5 D, 5I        | GAP43-eYFP                            | 0.20               | 1           | NA                  | Zeiss 780                | Injected                             |
| 5E, 5F, 5G, 5J | GAP43-eYFP                            | 0.38               | 2           | 5 min               | Zeiss Z1                 | Injected                             |

767
